# Supplementary material for: Identification of baseline gene expression signatures predicting therapeutic responses to three biologic agents in rheumatoid arthritis: a retrospective observational study
Source: Springer Nature journal article supplement (doi:10.1186/s13075-016-1052-8), 2016-07-08
Supplement: MOESM1 [file 10538874]

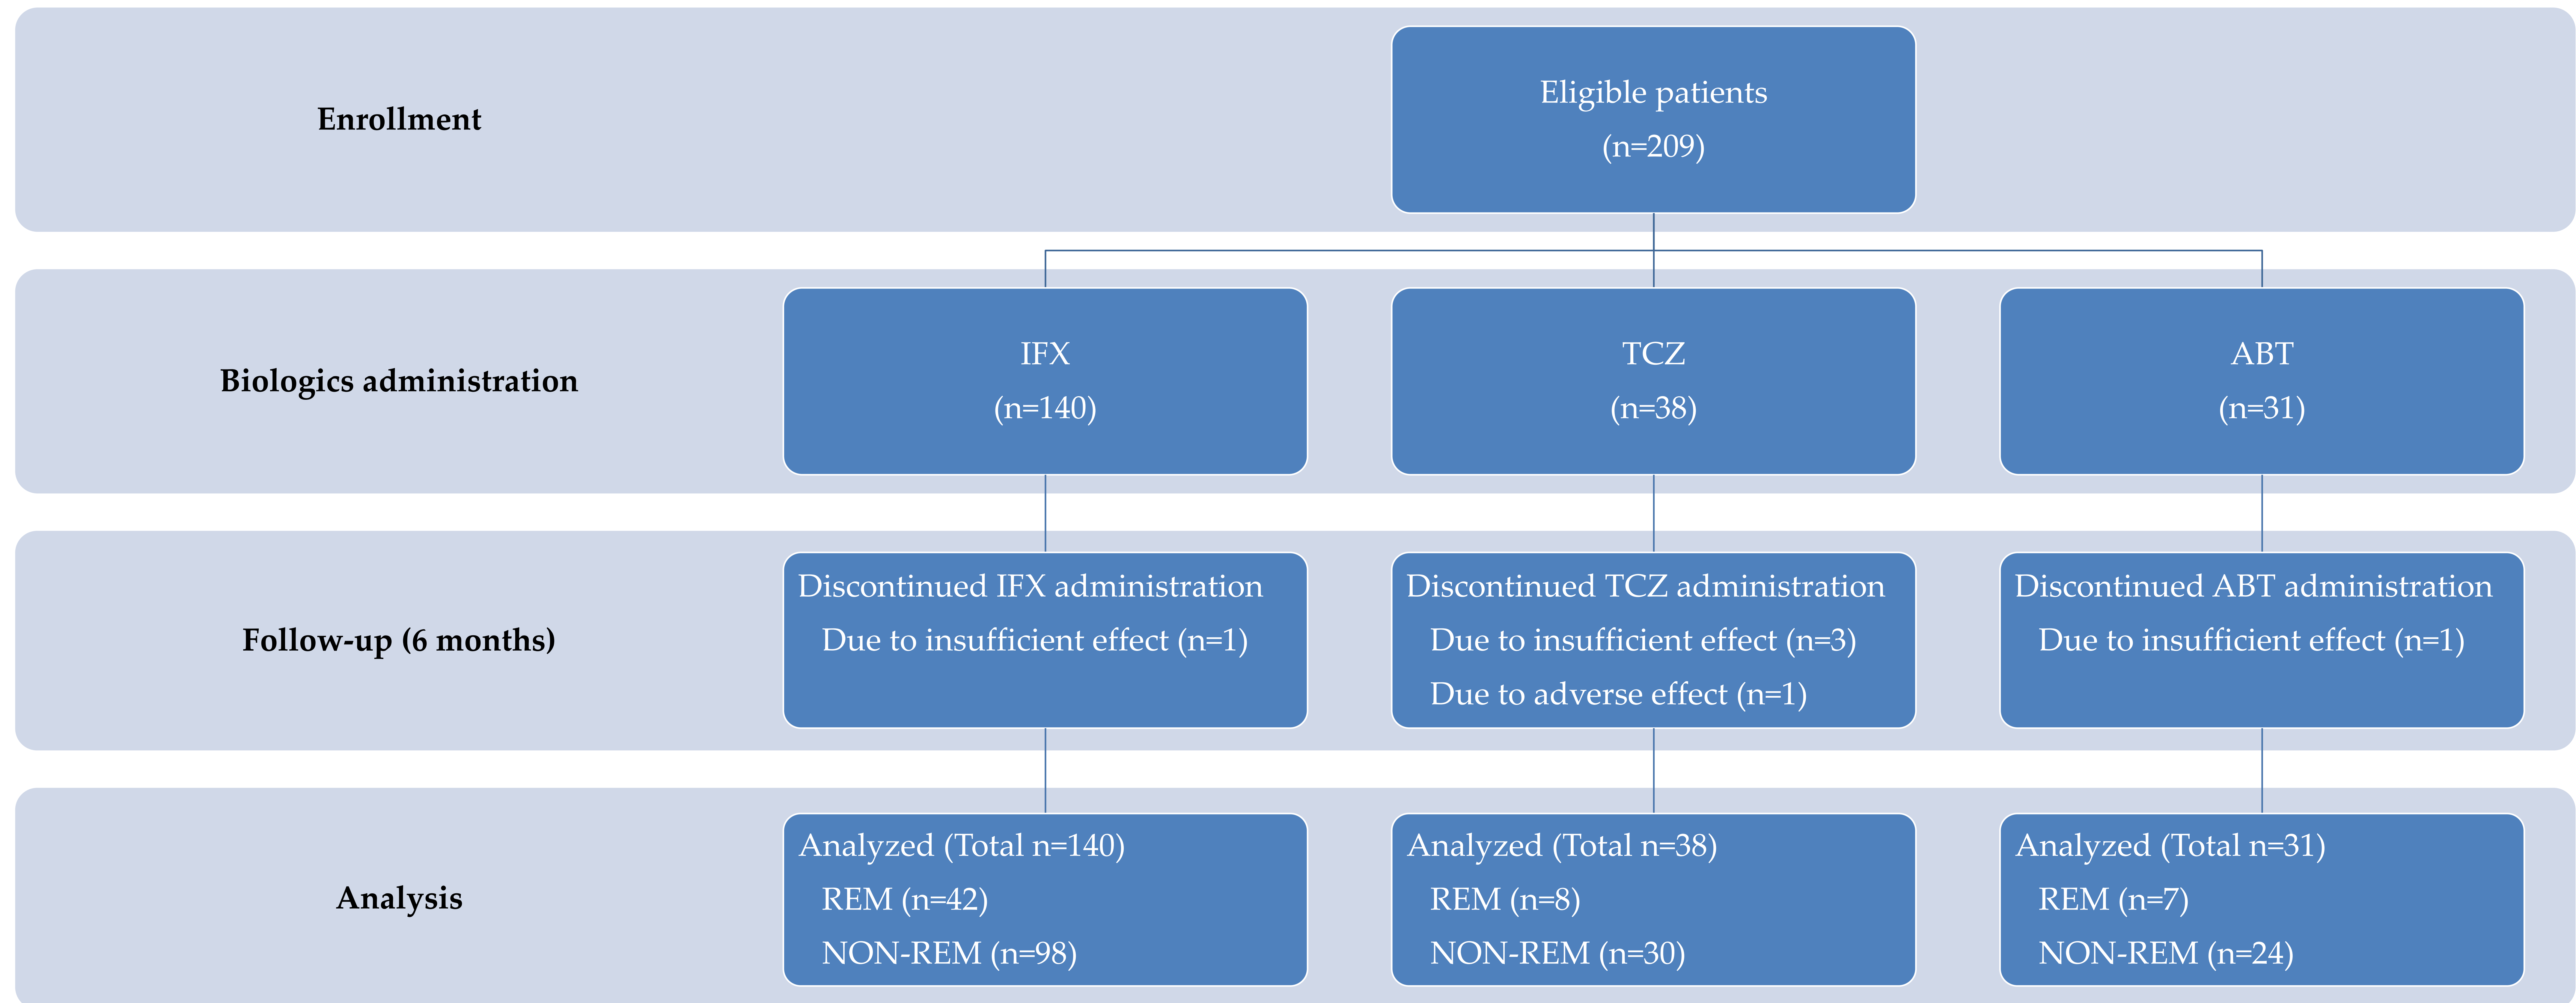

**Additional file 1** Illustration of the distribution of patients in this observational study. IFX, infliximab; TCZ, tocilizumab; ABT, abatacept.
