# Supplementary material for: Identification of baseline gene expression signatures predicting therapeutic responses to three biologic agents in rheumatoid arthritis: a retrospective observational study
Source: Springer Nature journal article supplement (doi:10.1186/s13075-016-1052-8), 2016-07-08
Supplement: MOESM2 [file 10538874]

## Sheet: Additional file 1
Additional file 2 Blood cell type-specific expressed gene sets.
specific-CD4 (Watkins2009)	specific-CD8 (Watkins2009)	specific-CD14 (Watkins2009)	specific-CD19 (Watkins2009)	specific-CD56 (Watkins2009)	specific-CD66b (Watkins2009)	specific-EB (Watkins2009)	specific-MK (Watkins2009)	Bcells-Induced (Allantaz2012)	Eosinophils-Induced (Allantaz2012)	mDCs-Induced (Allantaz2012)	Monocytes-Induced (Allantaz2012)	Neutrophils-Induced (Allantaz2012)	NK cells-Induced (Allantaz2012)	pDCs-Induced (Allantaz2012)	Tcells-Induced (Allantaz2012)
ANK3	CD248	ACOX2	2DOA	ADAMTS1	A2A3Q1	A2ABD1	ABCC4	ADAM28	ACPP	C1orf54	ALDH1A1	ABHD5	ABCB1	AEBP1	BAG3
AQP3	CD8A	ADAM15	2DOB	AKR1C3	A2BER5	A4GALT	ABHD4	AFF3	ADORA3	C9orf165	ASGR1	ABTB1	ADAMTS1	AHI1	BCL11B
AXIN2	CD8B	ALDH2	ABCB4	ASCL2	AATK	ABCB10	ADCY6	AIM2	AREG	CADM1	C4orf18	ACSL1	ADRB2	AJAP1	C13orf15
C20orf82	DKK3	ANG	ACBD3	BNC2	ABCA1	ABCC5	ALDH7A1	BANK1	AREGB	CD1C	CYP1B1	ADM	APOBEC3F	APP	C6orf190
C3orf59	LOC650761	ANKRD33	ADAM28	BZRAP1	ABCG1	ACAT1	ALG10B	BIRC3	C10orf128	CLEC10A	FCN1	ALPK1	APOBEC3G	ATP13A2	CD28
C6orf105		ANKRD50	ADK	C18orf23	ABHD2	ACSBG1	ALOX12	BLK	CAT	CLIC2	HNMT	AMPD2	BNC2	BSPRY	CD3D
CD40LG		ANXA2P1	AFF3	C1orf21	ABHD3	ADAMTS3	ANGPT1	CD19	CCR3	CNRIP1	LOC284837	ANXA3	BZRAP1	C10orf58	CD3G
CHN1		ANXA5	AIM2	C3orf57	ABP1	ADCK1	ARHGAP18	CD200	CD9	CTSG	MAFB	AQP9	C1orf21	C1orf186	CD6
CMTM8		AP1S2	ARHGAP17	CCL3	ABR	ADD2	ARHGAP21	CD22	CEBPE	DEPDC6	MGST1	ARG1	CACNA2D2	C20orf103	CDR2
CRIP2		APLP2	ARHGAP24	CCL3L1	ABTB1	ADFP	ARMCX1	CD37	CLC	ELA2	MS4A14	AXUD1	CCL5	C9orf128	CHRM3
CTLA4		ARSD	BACH2	CCL3L3	ABTB2	AFG3L2	ARMET	CD40	CSF1	ENPP1	MS4A7	B3GNT5	CD160	CCDC50	FBXL16
DPP4		ASAHL	BANK1	CCL4	ACOX1	AK2	ASB9	CD72	DSC2	GPR126	NRG1	BCL6	CD247	CDH1	FLT3LG
DUSP4		ASB13	BCAS4	CCL4L1	ACSL1	ALAD	ATP2C1	CD79A	EMR1	HDC	PLA2G7	BTNL8	CEP78	CIB2	GPR171
EDAR		ASGR1	BCL11A	CCL4L2	ADAM8	ALAS2	BAMBI	CD79B	EPAS1	INDOL1	RIN2	C15orf29	CHST12	CLEC4C	IL7R
EPHX2		ASGR2	BLK	CD160	ADAR	ALS2	BAT5	CNTNAP2	EPN2	KIT	SGMS2	C19orf22	CHST2	CLN8	LDLRAP1
FBXL16		ATBF1	BLNK	CD247	ADIPOR1	ALS2CR2	BEX1	COL4A3	GFI1B	LAMP3	SLC7A7	C1orf183	CMC1	COBL	LEF1
FHIT		C11orf75	BLR1	CHST12	ADM	AMHR2	C10orf38	CPNE5	GPR34	LOC26010	SMARCD3	C20orf199	CST7	COL24A1	LOC129293
GAL3ST4		C14orf58	BTLA	CLIC3	ADORA3	AMMECR1	C10orf47	CR2	GPR44	LOC645638	STAB1	C5AR1	CTSW	CRYM	LRRN3
HKDC1		C1orf54	C13orf18	CMKLR1	ALOX15	ANK1	C12orf39	CXCR5	IL1RL1	MRC1	TMEM176A	C5orf32	CX3CR1	CUEDC1	MAL
HPCAL4		C1QA	C16orf74	COL13A1	ALOX5AP	ANKRD25	C14orf149	DSP	IL5RA	MRC1L1	TMEM176B	CEACAM3	ENPP4	CUX2	NELL2
ICOS		C1QB	C1orf165	COLQ	ALPL	APOC1	C14orf73	EAF2	INPP1	NAV1	VCAN	CEP63	EOMES	CXCR3	NOSIP
IL2RA		C22orf9	C22orf13	CX3CR1	AMD1	APOE	C18orf1	EBF1	LGALS12	NDRG2		CHI3L1	ERBB2	CYYR1	OXNAD1
IL6ST		C4orf18	C4orf34	EDG8	AMICA1	AQP1	C19orf51	FADS3	MLF1IP	SLAMF8		CMTM2	F2R	DAB2	PASK
INPP4B		CACNA2D3	C8orf13	FASLG	ANKRD13D	AQP2	C1orf150	FCER2	OLIG1	TACSTD2		CSF3R	FAM179A	DERL3	RNF157
LGALS3BP		CACNA2D4	C9orf45	FEZ1	ANKRD22	ARG2	C3orf52	FCRL1	PAPSS1			CYP4F3	FASLG	DKFZP586I1420	SIRPG
LOC642233		CALML4	CAMK1G	FGFBP2	ANP32A	ARHGAP23	C3orf54	FCRL2	PIK3R6			DDIT3	FEZ1	EMID2	TCF7
LOC648526		CCR2	CCR6	GK5	ANPEP	ARL4	C3orf60	FCRL5	PRSS33			DGAT2	FGFBP2	ENPP2	TNFRSF25
MAL		CD14	CD19	GNLY	ANTXR2	ART4	C5	FCRLA	RNASE2			DHX34	FLJ14213	EPHA2	TRAT1
MAN1C1		CD163	CD1C	GPR56	ANXA11	ARV1	C5orf13	FLJ42562	RNASE3			DOCK5	FUT11	EPHB1	UBASH3A
MEOX1		CD1B	CD200	GZMB	ANXA3	ASNS	C5orf23	HLA-DOB	SAMSN1			DUSP1	GK5	EPS8L2
NP_694946.1		CD1D	CD22	HOP	APBB1IP	ASS1	C9orf58	IFT57	SIGLEC10			FAM129A	GNLY	FCHSD2
NP_775934.3		CD300C	CD37	IGFBP7	AQP9	ATAD5	CALD1	IGL@	SORD			FAM174A	GNPTAB	FLJ42627
PI16		CD33	CD40	IL12RB2	ARFIP1	ATF5	CAPN11	IGLL3	VSTM1			FAS	GPR56	GAS6
PLEKHG5		CD68	CD72	IL2RB	ARG1	ATG4A	CAV2	IL4R				FPR2	GZMA	GPM6B
PLEKHK1		CD86	CD79A	KIR2DL1	ARHGAP25	ATP1B2	CCND1	KBTBD8				FRAT2	GZMH	GRAMD1B
PRKCA		CD93	CD79B	KIR2DL4	ARHGAP26	AVPI1	CD109	KLHL14				G0S2	GZMM	hCG_2024094
SGPP2		CEBPA	CD83	KIR3DL1	ARHGAP9	BAALC	CEP55	LOC100128009				GK	HOPX	HERPUD1
TCEA3		CECR1	CD86	KIR3DL2	ARID3A	BCAR1	CKB	LOC283663				HAL	IL2RB	HHAT
TRAT1		CENTA2	CDCA7L	KLRC1	ARID4A	BLVRB	CLEC1B	LOC91316				HIST1H2AC	KIR2DL5A	IDH3A
TRBV18		CES1	CNFN	KLRC3	ARRDC3	BRP44	CMTM5	MACROD2				HIST2H2AA3	KIR3DL1	IGFBP3
TSHZ2		CG38	CNTNAP2	KLRD1	ARSA	BSG	COL24A1	MGC39372				HIST2H2AA4	KLRB1	IL28RA
TSPAN18		CLDN23	COBLL1	KLRF1	ATG16L2	BTRC	CPA3	MICAL3				HSPA6	KLRC1	IL3RA
VSIG1		CLEC10A	COL4A4	LAIR2	AXUD1	C16orf73	CPB1	MS4A1				HSPC159	KLRC2	IRF4
WNT7A		CLEC3B	CPNE5	LDB2	AYTL1	C18orf10	CPXM1	NT5E				IFIT1	KLRC3	IRF7
		CLEC6A	CR2	LIM2	B3GNT8	C18orf56	CSRP1	OSBPL10				IFIT2	KLRD1	ITM2C
		COMMD9	CSNK1G3	LINGO2	B3GNTL1	C1orf198	CTDSPL	P2RX5				IL1B	KLRF1	KANK1
		CPNE8	CYBASC3	LOC401321	B4GALT5	C20orf108	CTTNBP2	PAX5				IL1R2	KLRK1	KCNA5
		CPVL	DBNDD1	LOC440266	BANP	C20orf46	CXCL2	PCDH9				IL8	LGR6	KCNK10
		CRTAP	DFNA5	LOC642253	BASP1	C2orf32	CYYR1	PIK3C2B				IL8RA	LOC100130872	KCNK17
		CSF1R	DNASE1L3	LOC645464	BAZ1A	C6orf117	DAAM1	PKIG				KCNJ15	LOC286087	KCTD5
		CST3	DUS2L	LOC648868	BAZ2B	CA1	DAD1	POU2AF1				KCNJ2	LPCAT1	KIAA1274
		CTSB	E2F5	MMP23A	BCL10	CA2	DCBLD2	PPAPDC1B				KIAA0329	MATK	KIRREL3
		CTSH	EAF2	MYOM2	BCL2A1	CA8	DDAH1	PRICKLE1				KIAA1324	MLC1	KRT5
		CTSZ	EBF	NCAM1	BCL3	CACHD1	DDEF2	PTPRK				LAMP2	MYBL1	LEPREL1
		CXCL10	EBI3	NCR1	BCL6	CALB2	DENND2C	RALGPS2				LRG1	MYOM2	LHFPL2
		CYBB	ELL3	NMUR1	BEST1	CAPRIN2	DEPDC1	RASGRP3				MCL1	NCAM1	LILRA4
		CYP1B1	FAIM3	NP_060401.2	BIN3	CBS	DEPDC6	SAV1				MGAM	NKG7	LOC116236
		CYP2S1	FAM129C	OSBPL5	BLZF1	CCDC34	DKK1	SCN3A				MME	NSMAF	LOC285972
		DAGLA	FAM3C	PDGFD	BMX	CCNE1	DLK1	SLC38A11				MMP9	OSBPL5	LOC643008
		DHRS4	FBXO16	PDGFRB	BPI	CD70	DNAJC12	SNX22				N4BP1	PAM	LOC692247
		DHRS4L2	FCER2	PDZD4	BTN2A1	CDC42BPA	DNM1L	STAP1				NAMPT	PDGFD	LRRC36
		DPYD	FCGR2B	PLEKHF1	BTNL8	CDC42EP4	DNM3	SWAP70				NF-E4	PHLDB2	LTK
		DPYSL2	FCRL1	PRF1	C10orf118	CDT1	DNMT3B	TAPT1				ORM1	PLEKHF1	MAP1A
		DUSP3	FCRL2	PRSS23	C10orf128	CEP152	DOCK1	TPD52				ORM2	PPP2R2B	MCC
		ECGF1	FCRL3	PTGDR	C10orf33	CLCN3	DPPA4	VPREB3				PHC2	PRF1	MGC29506
		EDG3	FCRL5	PTGDS	C11orf54	CMBL	DTD1	ZCCHC7				PI3	PRSS23	MOXD1
		EHD4	FCRLA	Q6ZVG4	C12orf35	CPOX	EFHC2					PPP1R3B	PTGDR	MREG
		EMILIN2	FLJ22531	Q8IVY7	C15orf29	CRISP2	EGF					PPP4R1	PTPN4	MYBL2
		EMP1	FLJ43505	RUTBC2	C15orf39	CTSL1	ELOVL7					PROK2	PYHIN1	MYO1E
		EPB41L3	GGA2	SH2D1B	C16orf54	CTXN1	EMILIN1					PTGS2	RAB27B	NRP1
		ERICH1	GLDC	SIGLECP3	C16orf57	CXADR	ESAM					RNF149	RGS3	OGT
		EXT1	GNG3	SPON2	C16orf72	DARC	EVI1					SEC14L1	RUNX3	PACSIN1
		FAM105A	GNG7	TKTL1	C19orf22	DECR2	EXOC3L2					SIPA1L2	S1PR5	PAPLN
		FAM20C	GPM6A	ZBTB16	C19orf35	DNAJA4	F2R					SLC12A6	SAMD3	PFKFB2
		FBN2	GPR18		C1orf183	DYRK3	F2RL2					SLC25A37	SH2D1B	PLD4
		FCN1	HA23		C1orf24	E2F2	FABP5					SLPI	SH2D2A	PLS3
		FER1L3	HA24		C1RL	E2F4	FABPE					SOD2	SPON2	PLXNA4
		FOLR2	HB21		C20orf111	EEF2K	FAIM					STEAP4	STOM	PPM1J
		FOSB	HIP1R		C20orf32	EGFL8	FAM64A					TLE3	SYTL2	PTGDS
		FPRL2	HLA-DOA		C20orf43	ELA2A	FAM69B					TNFAIP6	TBX21	PTK7
		FUCA1	HLA-DOB		C20orf74	ELL2	FAM98A					TNFRSF10C	TGFBR3	PTPRM
		FXYD6	HLA-DQA1		C3orf34	ENPP3	FCER1A					TREM1	TTC38	PTPRS
		FZD1	HLA-DQB1		C3orf62	EPB42	FHOD1					UBN1	WDR67	RAB15
		FZD2	HVCN1		C5AR1	EPOR	FKBP14					VNN2	XCL1	RABGAP1L
		GAS7	ID3		C5orf32	ERAF	FNBP1L					VNN3	XCL2	RASD1
		GPBAR1	IFT57		C6orf32	ERMAP	FREM1					VPS54		RBMS3
		GPR124	IGHG2		C9orf164	ESPN	FUNDC1							RGS7
		GPR30	IGHV1-46		CA4	ESRRG	FUT8							RIMS3
		GPR35	IGHV1-58		CABIN	EXO1	GAMT							RUNX2
		GRN	IGHV2-26		CACNG6	FAM83A	GCNT1							SCAMP5
		H2AFY	IGHV3-49		CALCOCO1	FAM89A	GJA4							SCARA5
		HEXB	IGJ		CAMK1D	FBXO7	GOLT1B							SCARB2
		HMOX1	IGKV1-33		CAMK2G	FDXR	GP1BA							SCN9A
		HNMT	IGKV1-9		CAMP	FECH	GP1BB							SCT
		HOMER3	IGKV1D-33		CANT1	FGFR3	GP5							SEMA5A
		HTRA1	IGKV1D-43		CAPNS2	FKBP4	GP6							SERPINF1
		IFI30	IGKV1D-8		CARD8	FREQ	GP9							SLC18A2
		IL15	IGKV2-30		CASC3	FRMD4A	GSTM5							SLC35F3
		KCTD12	IGKV2-40		CASP5	GAD1	GUCY1A3							SLC7A11
		KIAA1212	IGKV2D-30		CASP8	GADD45GIP1	GUCY1B3							SLC7A5
		KIAA1598	IGKV3-11		CAT	GAL	HGD							SRPX
		KLF10	IGKV3-20		CCDC126	GALNT5	HMGN1							ST6GALNAC4
		KLF11	IGKV3D-11		CCDC49	GATA5	HSD17B14							STMN1
		KLF4	IGKV3D-20		CCL23	GCHFR	IFRD2							TCF4
		LGALS2	IGKV5-2		CCNDBP1	GDF15	ILK							TEX2
		LGALS3	IGKV6-21		CCNG2	GLRX5	IRX3							TLR7
		LILRB1	IGLV8-61		CCNJL	GNA11	ISCA1							TLR9
		LOC162073	IL4R		CCPG1	GPT	ITGA2							TNFRSF21
		LOC284837	ILDR1		CCR1	GPT2	ITGA2B							TPM2
		LOC653518	IRF4		CCR3	GSTT1	ITGA8							TRAF4
		LRP1	IRF8		CD46	GYPA	ITGB5							UBE2E3
		LYZ	ITM2C		CD55	GYPB	ITPKA							UGCG
		MAFB	ITPR1		CD97	GYPC	KIF2A							VASH2
		MAN2B1	KCNG1		CDA	GYPE	KLHDC5							WNT10A
		MARCO	KIAA1407		CDC42EP2	HAGH	LAMB2							ZDHHC17
		MS4A6A	KLHL14		CDH2	HBA1	LAPTM4B							ZFAT
		MS4A7	KMO		CDIPT	HBA2	LAT							ZNF589
		MTMR11	LARGE		CDKN2D	HBE1	LGMN
		NAGA	LOC389641		CDS2	HBQ1	LIMS1
		NETO2	LOC390712		CEACAM1	HBZ	LOC283683
		NFE2L3	LOC400509		CEACAM3	HEATR2	LOC346887
		NLRP3	LOC641700		CEACAM6	HEBP1	LOC649260
		NP_001034485.1	LOC642299		CEACAM8	HES5	LOC652175
		NP_061134.1	LOC642701		CEBPB	HES6	LRP8
		NP_115986.3	LOC644641		CEBPE	HIC2	LRRC16
		NP_940938.1	LOC644908		CENTD3	HIST1H4B	LRRC32
		NR_003276.1	LOC647606		CEP63	HIST1H4E	LRRC8B
		NRG1	LOC649812		CFLAR	HIST2H4	LRRFIP2
		OAF	LOC653761		CHIC2	HK1	LSMD1
		OAS1	LOC654191		CHMP2A	HLTF	LTBP1
		OLFM1	LOC90925		CHST7	HMBS	LY6G6D
		P2RX7	MOSC2		CHSY1	HOXB5	MAOB
		PID1	MOXD1		CIR	HPS1	MAP1A
		PLA2G7	MS4A1		CKLF	HSPA4L	MAPK12
		PLD3	NAPSA		CLC	IFRD2	MARCH4
		PLXNB2	NAPSB		CLEC4E	IFT122	MED12L
		PRAM1	NP_056002.1		CMTM2	IGFL2	MEIS1
		RASSF4	NP_071409.2		CNTNAP3	IPO11	MGLL
		RIN1	NP_659410.3		CNTNAP3B	IQWD1	MLLT11
		RIN2	NP_689963.2		CPD	ISG20L1	MMRN1
		RNF213	NP_742001.1		CR1	ISOC2	MPL
		RPS6KA4	NP_775783.1		CREB5	KCNH2	MYCN
		RRAS	NT5E		CRK	KEL	MYEOV
		RTN1	OPN3		CSF2RA	KIAA0495	MYLK
		SAMD4A	OSBPL10		CSF2RB	KIAA0859	MYOM1
		SASH1	P2RX5		CSF3R	KIAA1522	MYOZ3
		SAT2	PACAP		CSNK1G2	KIT	NDN
		SCARB2	PALM2		CTBS	KLF1	NEK6
		SCPEP1	PAOX		CTSG	KRT13	NFIB
		SERPINB8	PARM1		CXCL1	KRT19	NLK
		SGK3	PFTK1		CXCL14	LEG7	NP_001003693.1
		SLC24A4	PKIG		CXCL6	LEPR	NP_054900.1
		SLC27A1	PLEKHA2		CXorf23	LGALS7	NP_115981.1
		SLC29A3	PLEKHF2		CYB5R4	LGR4	NP_694978.2
		SLC2A9	PLEKHG1		CYP4F12	LOC440804	NP_997327.1
		SLC36A4	PNOC		CYP4F3	LOC643904	NT5M
		SLC37A2	POLD4		DACH1	LOH11CR2A	P2RX1
		SLC46A2	POU2AF1		DAPK2	LONP1	P2RY1
		SLC7A7	PPAPDC1B		DDEF1	LRP11	PBX1
		SLITRK4	PPM1K		DDIT3	LXN	PCYOX1L
		SMARCD3	PRKCE		DDOST	MAGI1	PDE5A
		SMPDL3A	PTPRK		DDX58	MAOA	PDE8B
		STAB1	PTPRO		DEDD2	MARCH3	PDGFC
		SUMF1	Q13808		DEFA3	MCAT	PDIA5
		TBC1D2	Q8N8D0		DEFA4	MELK	PHLDB1
		TBC1D8	Q8TB02		DEFT1P	METAP2	PHTF1
		TCN2	QRSL1		DENND3	MGST3	PLA2G3
		TDRD9	RAB30		DGAT2	MICALL2	PLA2G4A
		TGFBI	RALGPS2		DGCR2	MINPP1	PLCH1
		TICAM2	RHPN2		DHRS9	MIPEP	PLEK
		TMEM176A	RNGTT		DHX34	MPST	PLEKHC1
		TMEM51	RP9		DKFZp761E198	MRPS17	PLOD2
		TNFSF13	RUNDC2A		DNAJC3	MRPS9	PPAPDC3
		TPP1	SAV1		DPEP2	MST1	PPFIBP1
		TRPV4	SDK2		DPEP3	MUC1	PPIC
		TTYH2	SETBP1		DSC2	MYB	PPP1R14A
		TTYH3	SGCE		DTX2	MYH10	PRICKLE2
		USP6	SLC2A5		DYSF	MYL4	PRKACB
		VCAN	SLC6A16		EFCBP2	MYO1D	PRTFDC1
		VENTX	SNX22		EGLN1	NAT14	PSTPIP2
		XR_017883.1	SNX25		EIF2AK2	NDFIP2	PTGER3
		ZDHHC1	SP140		EIF2C4	NFIA	PTGS1
		ZDHHC7	SPIB		ELA2	NP_056263.1	PTPLA
		ZNF385	SSPN		ELF2	NP_056496.1	Q5SQ64
		ZNF503	ST6GAL1		ELL	NP_057452.1	Q5TBE2
		ZNF703	STAG3		ELOVL5	NP_057574.2	Q6ZTF7
			STAP1		EMR1	NP_060895.1	Q8NBX4
			STEAP1		EMR2	NP_112203.1	Q96NA9
			SWP70		EMR3	NP_203751.2	RAB27B
			SYBU		EMR4	NP_619731.1	RAB33A
			SYPL1		EP300	NSMCE2	RAB38
			SYT17		ERGIC1	OAT	RAB3C
			SYVN1		ERO1L	OSBP2	RAC3
			TCF4		EVI2B	OSBPL6	RASA1
			TCL1A		F11R	PCK2	RBPMS2
			TCL1B		F2RL1	PCSK9	RKHD3
			TEAD2		FAM101B	PHLDA3	ROBO3
			TLR10		FAM126B	PIGQ	RRN3
			TMEM156		FAM129A	PIK3R2	RSU1
			TMEPAI		FAM23A	PKLR	RTN2
			TNFRSF13B		FAM49A	PLD1	RYR2
			TNFRSF13C		FAM53C	PLEK2	SALL2
			TNFRSF17		FAM63A	PLEKHH3	SAMD14
			TSPAN13		FAM8A1	PLVAP	SELP
			TSPAN3		FAS	PMP22	SERPINE2
			TXNDC5		FBXL13	PNMT	SH3GL3
			UBE2J1		FCGR2A	PPME1	SH3PXD2A
			UGT2B17		FCGR3B	PPOX	SHANK3
			UGT8		FFAR2	PRDX2	SIAE
			UVRAG		FHL3	PRG2	SLC16A10
			VAV2		FLJ14107	PRKAB1	SLC24A3
			VIL2		FLJ25084	PSAT1	SLC30A5
			VPREB3		FLJ34047	Q13209	SLC35D3
			ZBTB32		FLOT1	Q49A61	SLC37A1
			ZCCHC7		FLOT2	Q6ZMM7	SLC44A1
			ZDHHC23		FNDC3B	Q8N7N0	SLC8A3
			ZNF154		FOXO3A	Q9UDY6-2	SMAD6
			ZNF342		FPR1	RAB3IL1	SMTN
			ZNF532		FPRL1	RAP1GAP	SNCA
					FRAT1	RARRES1	SPR
					FRAT2	RASD1	SRC
					FRY	RDH10	ST3GAL3
					FUT7	RELN	STARD8
					G0S2	REXO2	STS1
					GAB2	RFESD	STXBP5
					GABARAPL2	RHAG	SUCNR1
					GBP6	RHD	SV2A
					GCA	RHOBTB3	TBXA2R
					GDPD3	RNASE1	TCEAL1
					GHRL	RNF123	TCEAL4
					GK	RPS6KL1	TCTEX1D1
					GLT1D1	RUVBL2	TEAD4
					GMFG	S100A3	TGFB1I1
					GMIP	SCMH1	THBS1
					GNAI3	SDC4	THUMPD2
					GNAQ	SEC22C	TM7SF2
					GNB2	SELENBP1	TMEM136
					GNG10	SETD8	TMEM163
					GPR109A	SLC11A2	TMEM45A
					GPR109B	SLC16A9	TMSL8
					GPR177	SLC25A21	TPM2
					GPR44	SLC25A39	TPM4
					GPR77	SLC2A1	TRPC6
					GPR97	SLC36A1	TSPAN9
					GPSM3	SLC38A5	TTC27
					GSK3B	SLC43A1	TWSG1
					H3L	SLC4A1	TYBN
					HAL	SLC6A8	UBE2C
					HBP1	SLC6A9	URP2
					HCG27	SNCAIP	VANGL2
					HCK	SOCS2	VCL
					HECW2	SORBS1	VEGFC
					HERC3	SPA17	VWF
					HERC5	SPATA9	WASF3
					HES4	SPRED2	WBP5
					HIF1A	SPTB	WFDC1
					HIP1	SREBF1	WNT11
					HIST1H1C	STX2	WRB
					HIST1H2AC	SYCP1	WRNIP1
					HIST1H2AD	SYNGR1	XYLT2
					HIST1H2BC	TAC3	ZFPM2
					HIST1H2BE	TACC2
					HIST1H3D	TACSTD1
					HIST2H2AA3	TANC1
					HIST2H2AA4	TFDP1
					HIST2H2AC	TFRC
					HIST2H2BA	TGM2
					HLA-C	TMEM14B
					HLX1	TMEM14C
					HN1	TMEM56
					HSD17B7	TMEM63B
					HSDL2	TMEM98
					HSH2D	TMOD1
					HSPA1A	TNFRSF19
					HSPA6	TNFSF9
					HTATIP2	TNNI3
					HTR3B	TPSB2
					IAG2	TPSD1
					IBRDC3	TPSG1
					ICAM3	TRAP1
					IDS	TRAPPC6B
					IFIT1	TRIB3
					IFIT2	TRIM10
					IFIT3	TRYA1
					IFITM2	TSC22D1
					IFNAR1	TSPAN17
					IFNAR2	TSPAN5
					IFRD1	TST
					IGF2R	TSTA3
					IGSF6	TTLL12
					IL13RA1	TUBB2B
					IL17RA	TUBB6
					IL1B	U464
					IL1R2	UBAC1
					IL1RAP	UROS
					IL1RN	VAT1
					IL5RA	WDR34
					IL6R	XR_017029.1
					IL8	YPEL4
					IL8RA
					IL8RB
					IMPA2
					INDO
					IRF1
					IRF2
					ISG15
					ISGF3G
					ITM2B
					ITPK1
					JMJD2B
					K0232
					K1024
					KBTBD7
					KCNJ15
					KCNJ2
					KIAA0247
					KIAA1324
					KIAA1539
					KIAA1754
					KIAA1949
					KIF1B
					KIF27
					KLF6
					KLHL2
					KREMEN1
					KRT23
					LAMP2
					LENG4
					LGALS12
					LILRB3
					LIMK2
					LIN7A
					LITAF
					LNPEP
					LOC196752
					LOC283547
					LOC388312
					LOC388572
					LOC388969
					LOC400793
					LOC402176
					LOC440731
					LOC441124
					LOC441193
					LOC641693
					LOC641710
					LOC642267
					LOC642334
					LOC642780
					LOC642788
					LOC642816
					LOC643313
					LOC645649
					LOC646144
					LOC646309
					LOC647834
					LOC649154
					LOC650967
					LOC651143
					LOC651612
					LOC651738
					LOC652578
					LOC652616
					LOC653600
					LPGAT1
					LRG1
					LRMP
					LRP10
					LRRFIP1
					LRRK2
					LSP1
					LST1
					LTF
					LY96
					LYN
					LYSMD2
					LYST
					MAK
					MANSC1
					MAP2K3
					MAP2K4
					MAP3K2
					MAP7D1
					MAPK14
					MAPK3
					MARK2
					MAX
					MBD6
					MCL1
					MEGF9
					MGAM
					MGC42367
					MGC45871
					MIDN
					MLF2
					MLL3
					MLLT7
					MME
					MMP25
					MMP8
					MMP9
					MNDA
					MOBKL2A
					MOSPD2
					MPPE1
					MPZL1
					MRVI1
					MS4A3
					MTHFS
					MTMR3
					MX2
					MXD1
					MYADM
					MYO1F
					MYST1
					NADK
					NALP12
					NBN
					NCF1
					NCF2
					NCF4
					NCOA1
					NDE1
					NDEL1
					NECAP1
					NEDD9
					NFIL3
					NINJ1
					NLRP12
					NOTCH1
					NOTCH4
					NOV
					NP_001008396.1
					NP_001013649.1
					NP_001013689.1
					NP_001013698.1
					NP_055702.1
					NP_055919.1
					NP_060541.3
					NP_060810.1
					NP_061160.2
					NP_061900.1
					NP_065930.2
					NP_073574.1
					NP_085055.1
					NP_085139.2
					NP_114131.1
					NP_689969.2
					NP_705835.1
					NP_710154.1
					NP_777579.1
					NP_789786.2
					NP_859068.2
					NP_997319.1
					NP_997397.1
					NRBF2
					NSFL1C
					NSUN7
					NTNG2
					NUAK2
					NUMB
					NUP50
					O00453-8
					O00627
					OASL
					OAZ2
					OBFC2A
					OGFRL1
					OLIG2
					OLR1
					OR10G3
					OR52K2
					ORM1
					ORM2
					OSBPL2
					OSBPL8
					OSGIN2
					OSM
					OTX1
					OXER1
					P2RY13
					P2RY14
					P54762-3
					PACSIN2
					PADI2
					PAK2
					PANX2
					PAPSS1
					PARP9
					PBEF1
					PBX2
					PCNX
					PCTP
					PDK3
					PDLIM7
					PELI1
					PFKFB4
					PGLYRP1
					PHC2
					PHF20L1
					PHF21A
					PHOSPHO1
					PI3
					PIAS1
					PIGB
					PIGX
					PIK3CD
					PINK1
					PKN2
					PLAGL1
					PLEKHQ1
					PLXNC1
					POLB
					POLR2J2
					PPCDC
					PPP1R12A
					PPP1R3B
					PPP1R3D
					PPP2R2A
					PPP4R1
					PR285
					PREX1
					PRKAR1A
					PRKCZ
					PROK2
					PRR13
					PRRG4
					PRSS33
					PSCD4
					PSG1
					PSG11
					PSG2
					PSG3
					PSG9
					PTAFR
					PTENP1
					PTGS2
					PYGL
					Q59G25
					Q5SP16
					Q6NYC8-2
					Q6ZN80
					Q6ZTK2
					Q6ZU05
					Q6ZV75
					Q85ZX8
					Q8N7N2
					Q8N8K0
					Q8WWB0
					Q96AM0
					Q96FP4
					QPCT
					RAB11FIP1
					RAB33B
					RAB3D
					RAB43
					RAD21
					RAF1
					RALB
					RALBP1
					RAP1A
					RAPGEF6
					RASSF2
					RASSF3
					RBM23
					RBPJ
					REM2
					REPS2
					RFFL
					RFWD2
					RFX2
					RGDSR
					RGS14
					RGS2
					RHOG
					RHOT1
					RIT1
					RMND5A
					RNASE3
					RNASEL
					RNASET2
					RNF103
					RNF13
					RNF145
					RNF149
					RNF24
					ROPN1L
					RPGR
					RPGRIP1
					RPS6KA5
					RRAGD
					RRM2B
					RSAD2
					S100A11
					S100P
					SBNO2
					SCRT2
					SCYL1
					SDCBP
					SEC14L1
					SELL
					SEPX1
					SGK
					SH3BP5L
					SH3GLB1
					SIGLEC10
					SIGLEC5
					SIPA1L2
					SIRPA
					SIRPB1
					SIRPD
					SLA
					SLC12A6
					SLC15A4
					SLC16A3
					SLC16A5
					SLC19A1
					SLC22A4
					SLC25A44
					SLC2A11
					SLC2A3
					SLC45A4
					SLC6A6
					SLCO3A1
					SLK
					SLPI
					SMAP1L
					SMCHD1
					SMPD3
					SOD2
					SOLH
					SORL1
					SOS2
					SP110
					SPAG9
					SPI1
					SPNS3
					SRPK2
					SSH2
					SSH3
					ST3GAL4
					ST3GAL6
					ST4S6
					ST6GALNAC2
					ST8SIA4
					STARD10
					STAT3
					STK40
					STX3
					STXBP3
					SULT1B1
					SVIL
					SYN2
					SYNJ1
					TAGLN2
					TALDO1
					TBC1D14
					TBL1X
					TCN1
					TCP11L2
					TFE3
					TFF3
					TGFA
					TGM3
					THBD
					THBS4
					THRAP2
					TLE3
					TLE4
					TLR1
					TLR6
					TM6SF1
					TMCC3
					TMEM140
					TMEM154
					TMEM157
					TMEM188
					TMEM49
					TMEM71
					TMEM8
					TMEM88
					TMUB2
					TNFAIP2
					TNFAIP6
					TNFRSF10B
					TNFRSF10C
					TNFRSF1A
					TNFRSF9
					TNFSF14
					TNIP1
					TNNI2
					TOPORS
					TP53INP2
					TPST1
					TREM1
					TREML2
					TRERF1
					TRIB1
					TRIM21
					TRIM39
					TRIM9
					TRPM6
					TSC22D3
					TSEN34
					TSPAN2
					TTRAP
					U2966
					UBAP1
					UBE2B
					UBE2R2
					UBN1
					UBR2
					ULK1
					UPF1
					USP10
					USP15
					USP32
					USP49
					USP6
					VASP
					VNN2
					VNN3
					VPS8
					VSTM1
					WDFY3
					WDR26
					WIPF2
					XKR3
					XKR8
					XPO6
					XR_015434.1
					YIPF3
					YPEL3
					ZBED1
					ZBTB34
					ZBTB48
					ZCCHC6
					ZDHHC18
					ZER1
					ZFAND3
					ZNF18
					ZNF20
					ZNF217
					ZNF281
					ZNF324
					ZNF33A
					ZNF350
					ZNF398
					ZNF438
					ZNF641
					ZNF646
					ZNF701
					ZNF746
					ZNFX1
					ZRANB1
