# Supplementary material for: Identification of baseline gene expression signatures predicting therapeutic responses to three biologic agents in rheumatoid arthritis: a retrospective observational study
Source: Springer Nature journal article supplement (doi:10.1186/s13075-016-1052-8), 2016-07-08
Supplement: MOESM3 [file 10538874]

# GSEA results

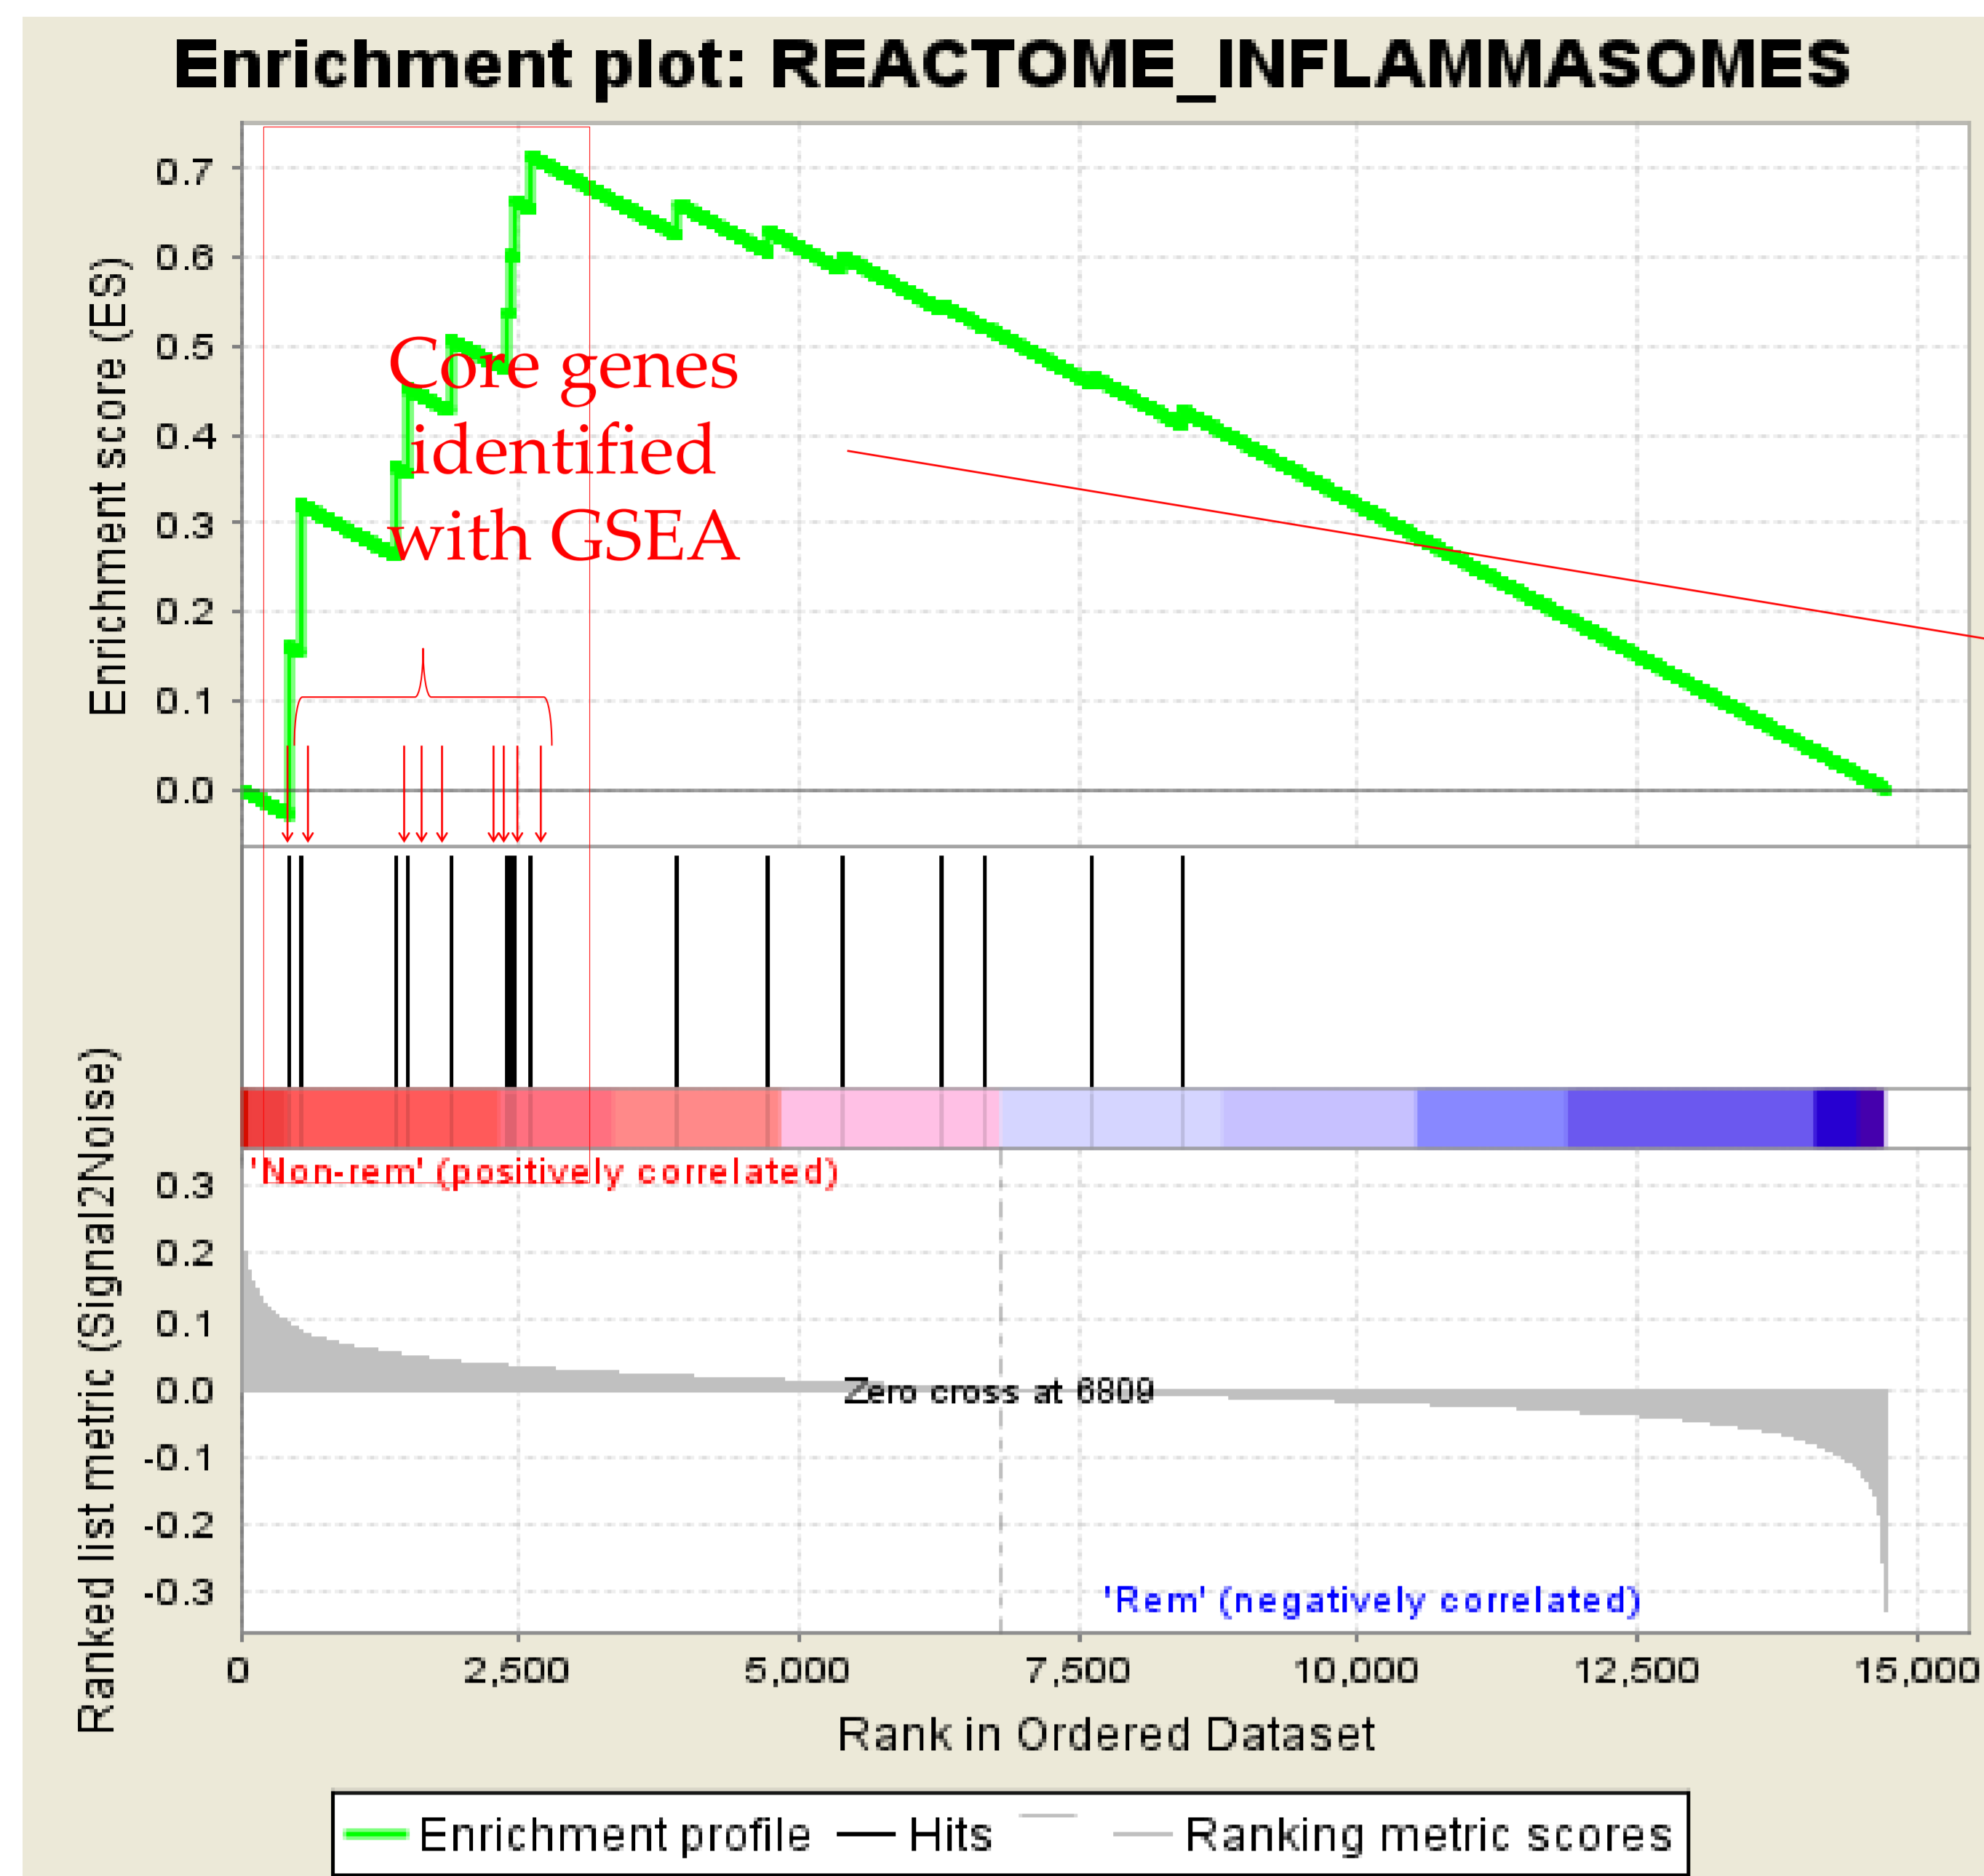

Array data (Quantile normalization values)

| Core gene \ Sample | Sample 1 | Sample 2 | ... | Sample 209 | Average | S.D. |
|--------------------|----------|----------|-----|------------|---------|------|
| Core gene 1        | 9.9      | 10.2     | ... | 11.3       | 10.47   | 0.74 |
| Core gene 2        | 5.3      | 4.3      | ... | 2.1        | 3.90    | 1.64 |
| Core gene 3        | 1.1      | 2.1      | ... | 1.5        | 1.57    | 0.50 |
| Core gene 4        | 5.2      | 5.5      | ... | 6.2        | 5.63    | 0.51 |
| Core gene 5        | 4.3      | 4.4      | ... | 5.3        | 4.67    | 0.55 |
| Core gene 6        | 2.3      | 5.3      | ... | 4.3        | 3.97    | 1.53 |
| Core gene 7        | 4.6      | 5.8      | ... | 9.8        | 6.73    | 2.72 |
| Core gene 8        | 5.5      | 7.5      | ... | 3.3        | 5.43    | 2.10 |
| Core gene 9        | 3.2      | 3.2      | ... | 2.3        | 2.90    | 0.52 |

Z-score transformation across all samples for each gene

Array data (z-score)

| Core gene \ Sample | Sample 1 | Sample 2 | ... | Sample 209 | Average | S.D. |
|--------------------|----------|----------|-----|------------|---------|------|
| Core gene 1        | -0.77    | -0.36    | ... | 1.13       | 0       | 1    |
| Core gene 2        | 0.86     | 0.24     | ... | -1.10      | 0       | 1    |
| Core gene 3        | -0.93    | 1.06     | ... | -0.13      | 0       | 1    |
| Core gene 4        | -0.84    | -0.26    | ... | 1.10       | 0       | 1    |
| Core gene 5        | -0.67    | -0.48    | ... | 1.15       | 0       | 1    |
| Core gene 6        | -1.09    | 0.87     | ... | 0.22       | 0       | 1    |
| Core gene 7        | -0.78    | -0.34    | ... | 1.13       | 0       | 1    |
| Core gene 8        | 0.03     | 0.98     | ... | -1.02      | 0       | 1    |
| Core gene 9        | 0.58     | 0.58     | ... | -1.15      | 0       | 1    |

Averaging z-score across all core genes for each sample

Signature score data

| Core gene \ Sample | Sample 1 | Sample 2 | ... | Sample 209 |
|--------------------|----------|----------|-----|------------|
| Signature score    | -0.40    | 0.25     | ... | 0.15       |

**Additional file 3** Procedure of signature score calculation. First, we extracted significant core genes from GSEA. Then each core gene was standardized using a z-score transformation method based on 209 patients' data. The average z-score of the core genes was defined as a signature score of the target gene set for each patient.
