# Supplementary material for: Identification of baseline gene expression signatures predicting therapeutic responses to three biologic agents in rheumatoid arthritis: a retrospective observational study
Source: Springer Nature journal article supplement (doi:10.1186/s13075-016-1052-8), 2016-07-08
Supplement: MOESM5 [file 10538874]

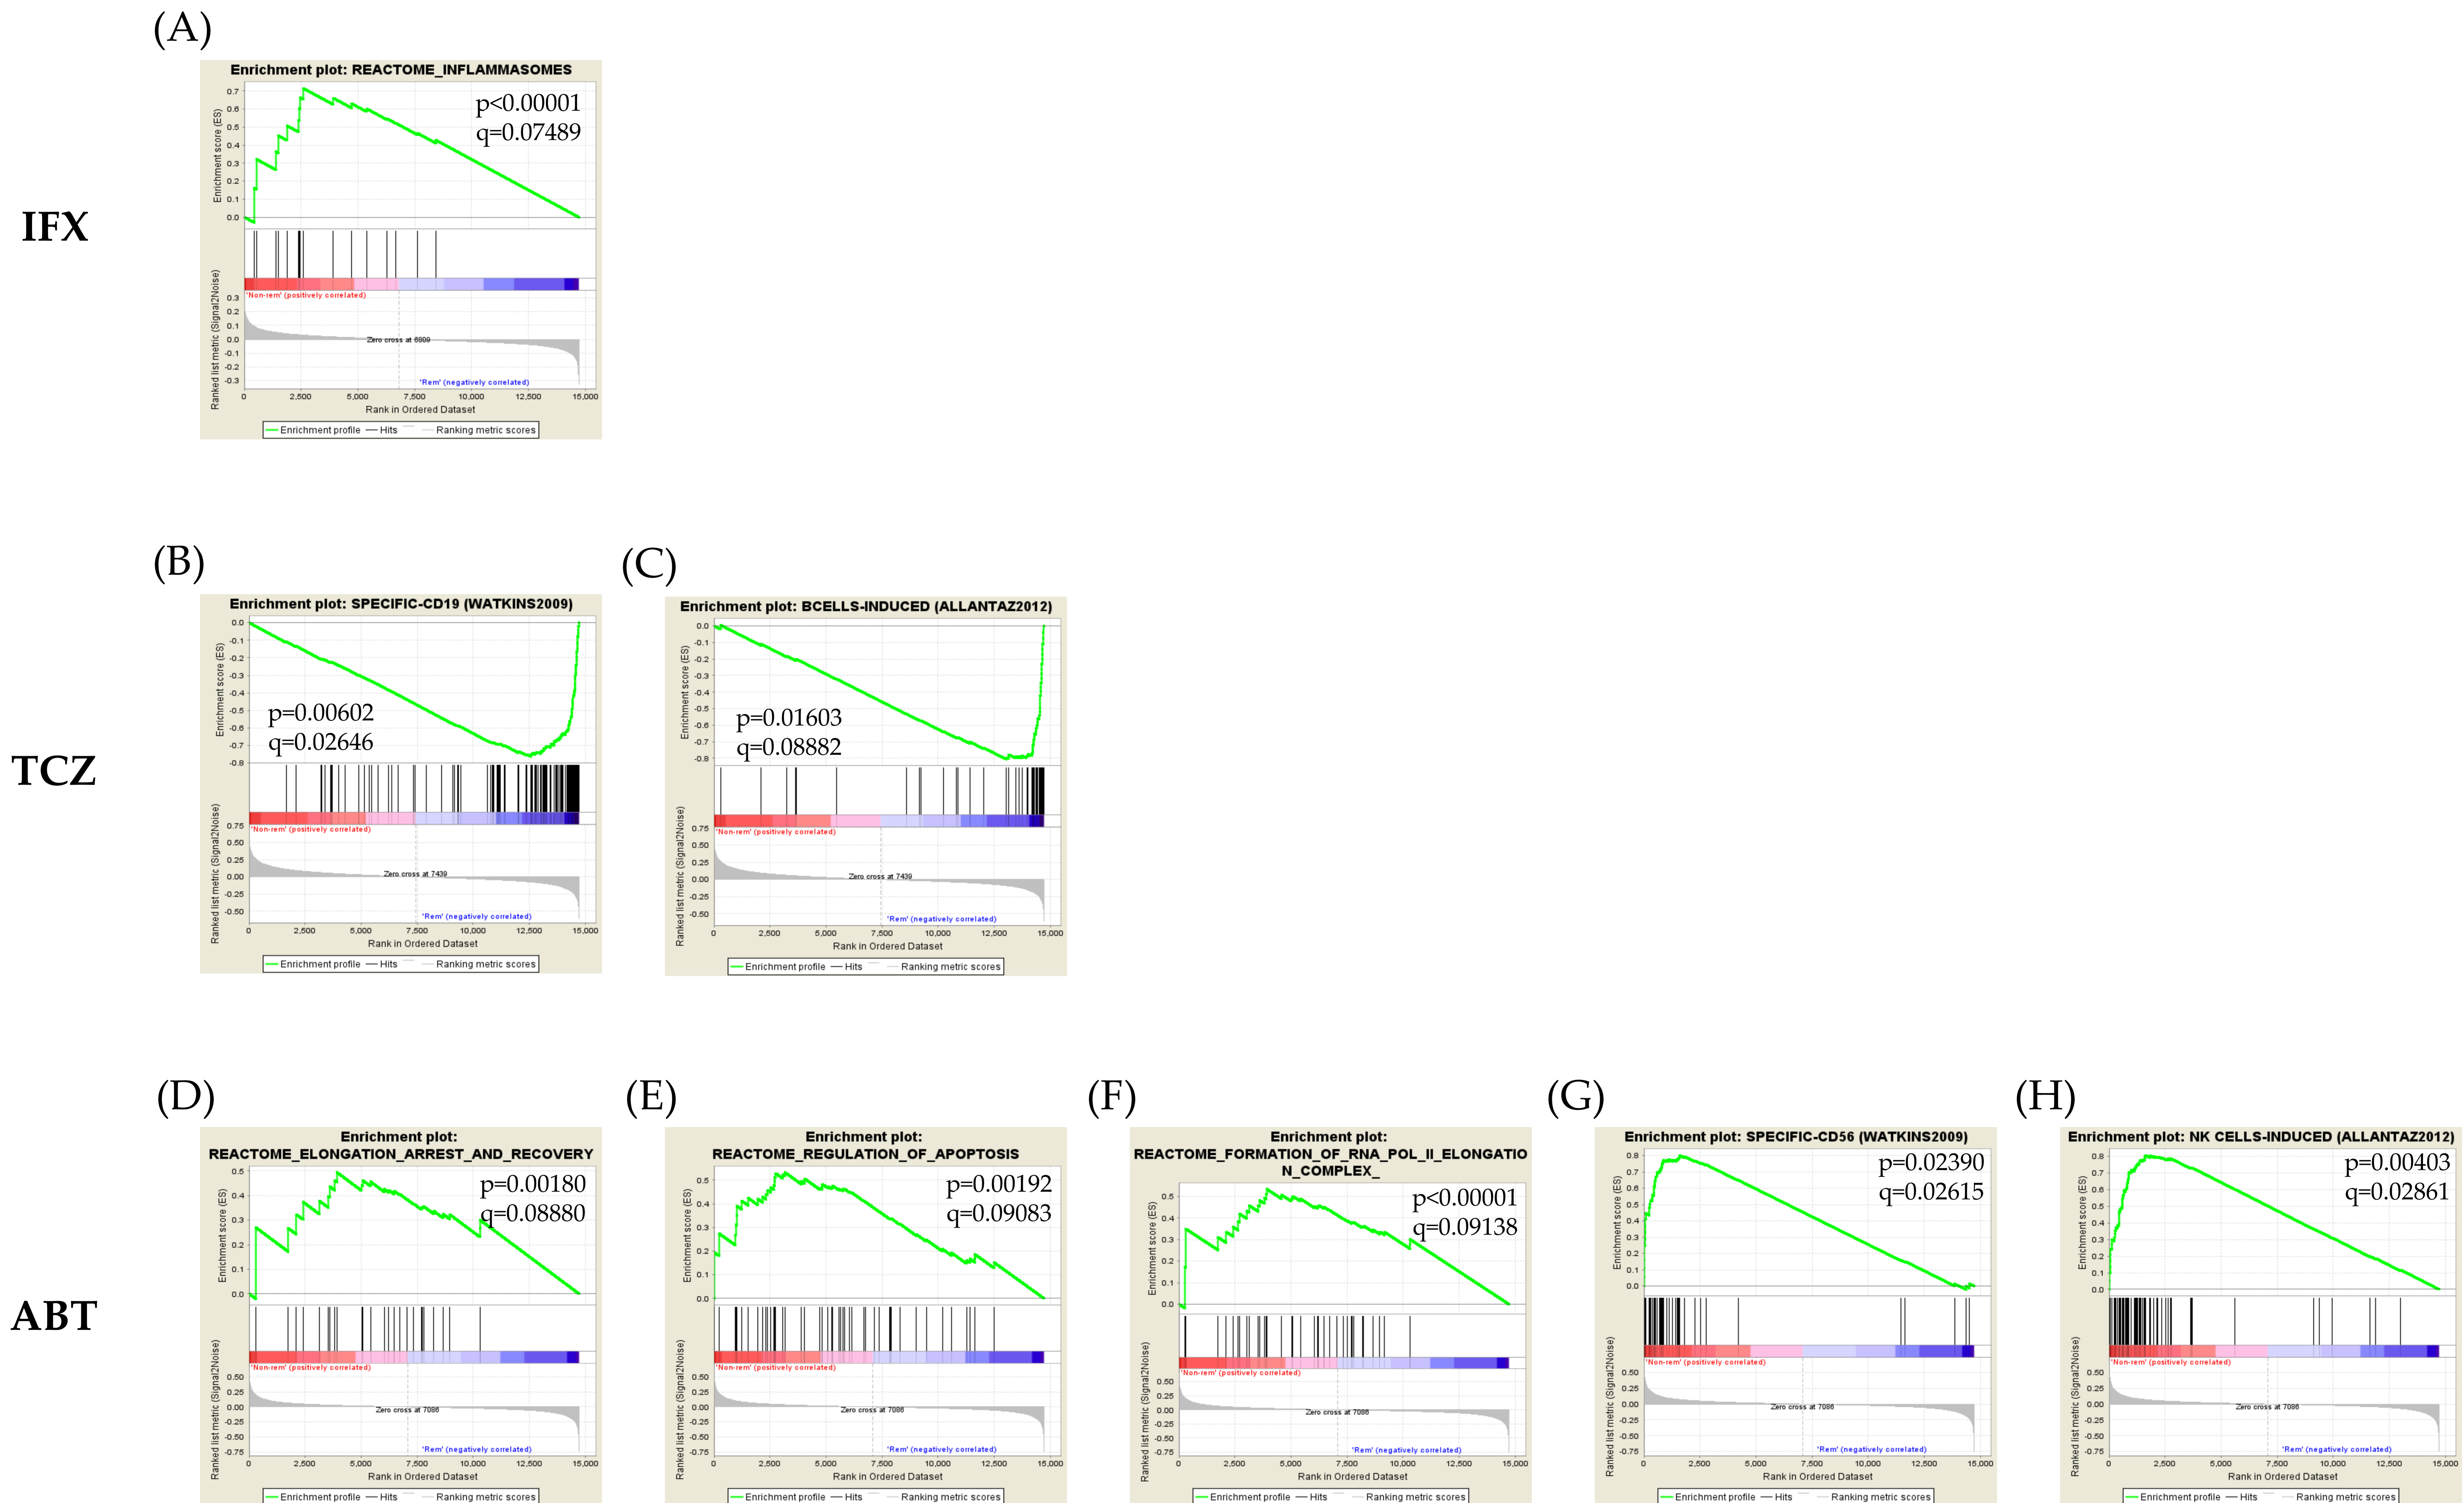

**Additional file 5** Enrichment-plots of gene sets extracted from GSEA. (A) inflammasomes, (B) Specific-CD19 (Watkins 2009), (C) B cells-induced (Allantaz 2012), (D) Elongation arrest and recovery, (E) Regulation of apoptosis, (F) Formation of RNA pol II elongation complex, (G) Specific-CD56 (Watkins 2009), (H) NK cells-induced (Allantaz 2012). A p-value < 0.05 and a q-value < 0.1 was considered statistically significant. REM, patients with CDAI remission\* at 6 months of biologic therapy; NON-REM, patients without CDAI remission\* at 6 months of biologic therapy. \* CDAI remission is defined as CDAI ≤ 2.8.
