# Supplementary material for: Identification of baseline gene expression signatures predicting therapeutic responses to three biologic agents in rheumatoid arthritis: a retrospective observational study
Source: Springer Nature journal article supplement (doi:10.1186/s13075-016-1052-8), 2016-07-08
Supplement: MOESM9 [file 10538874]

## Inflammasomes

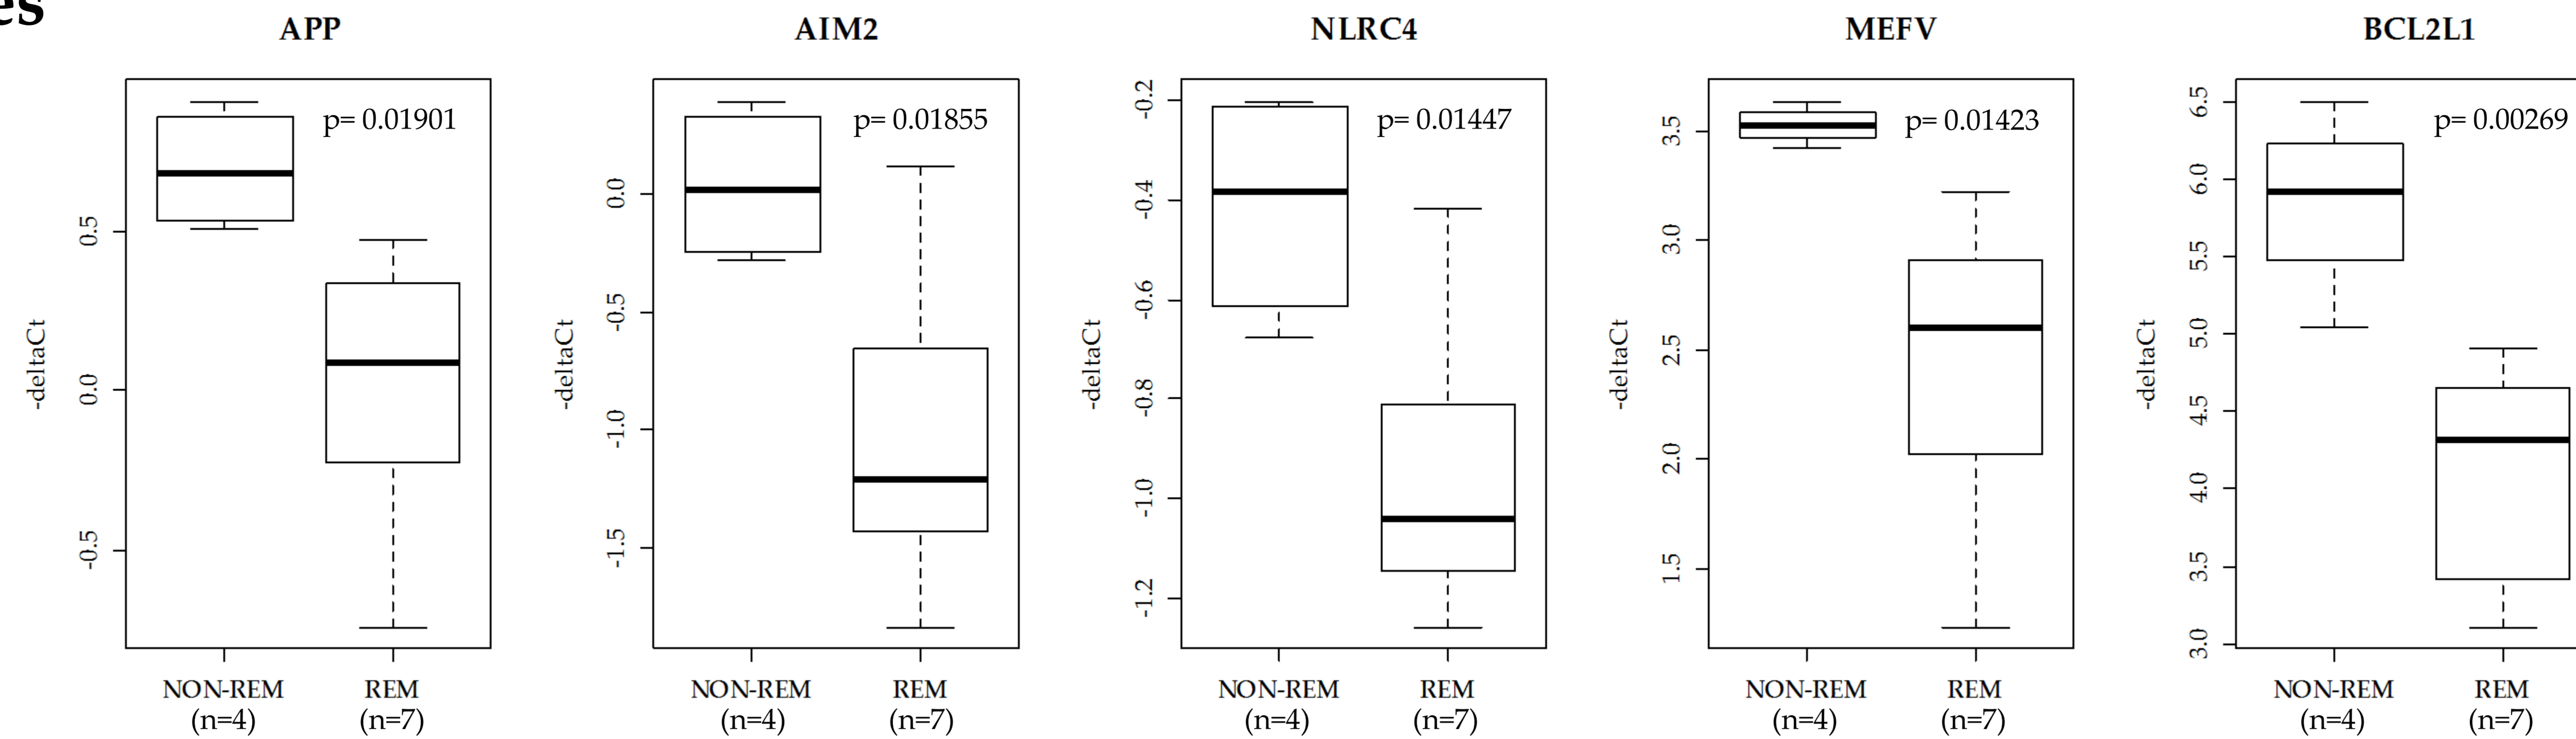

## Specific-CD19

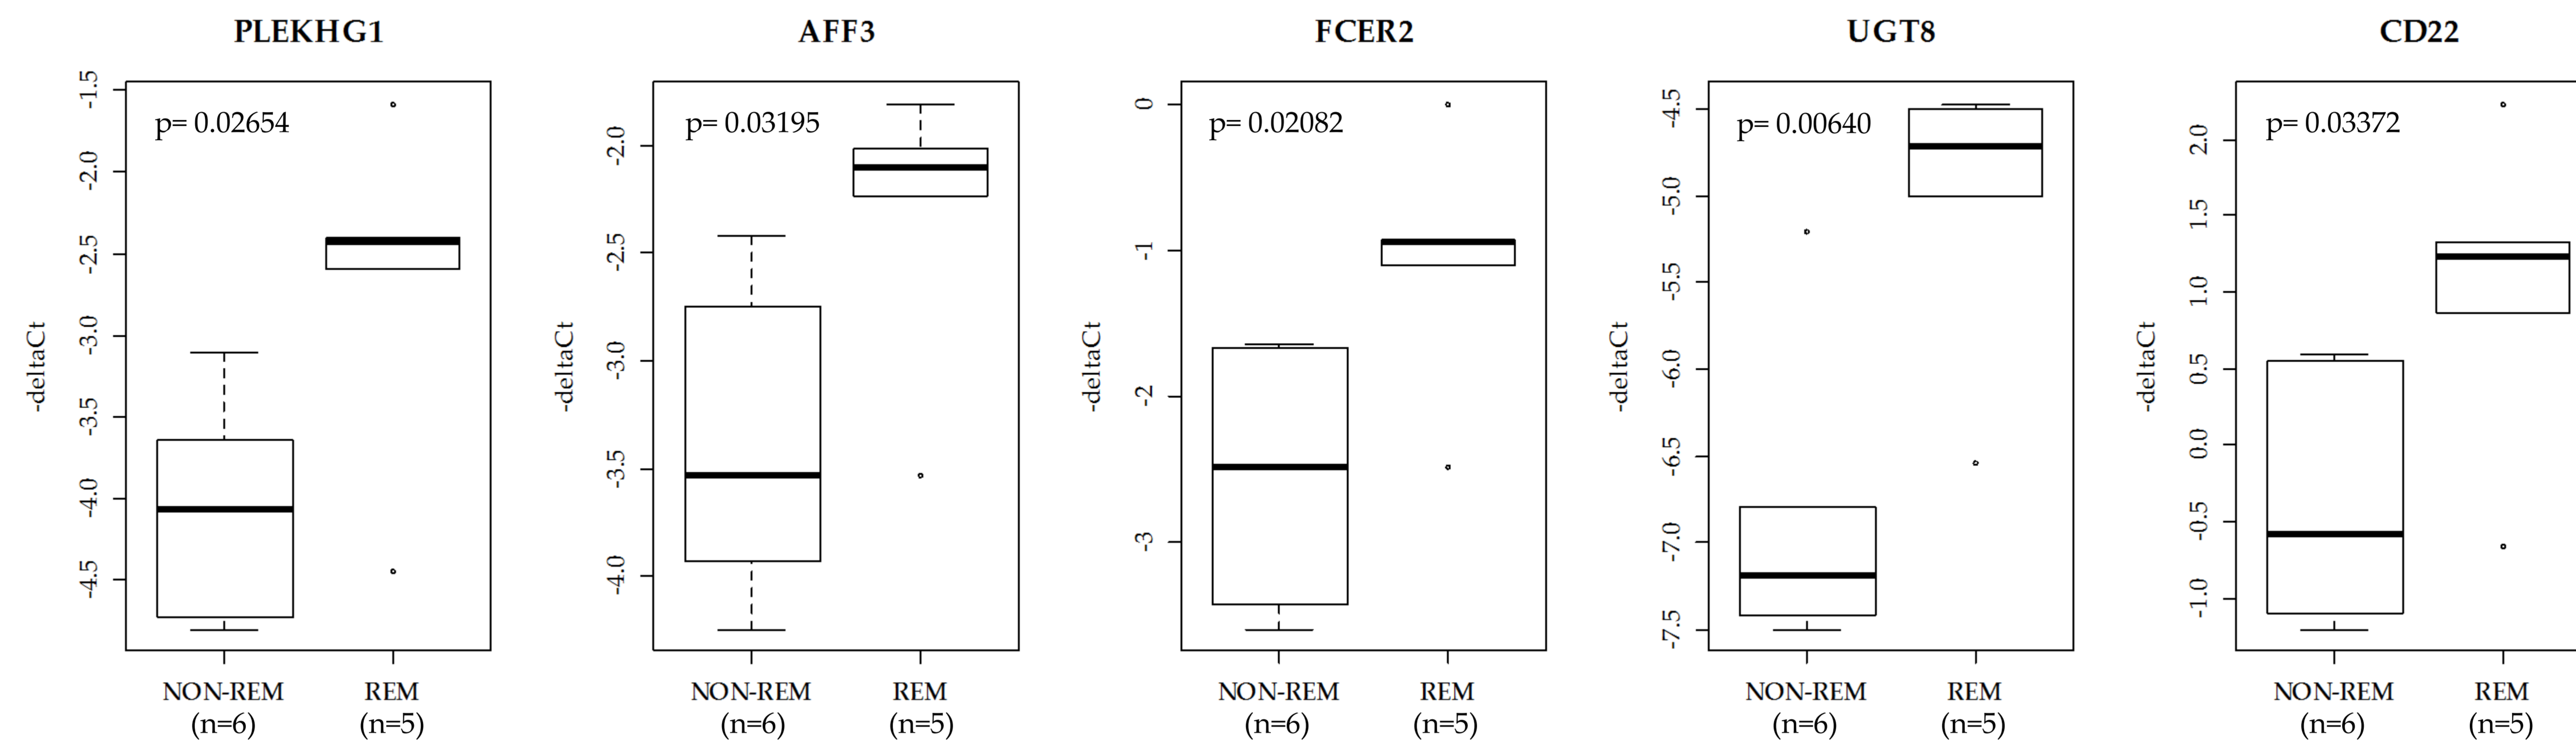

## Specific-CD56

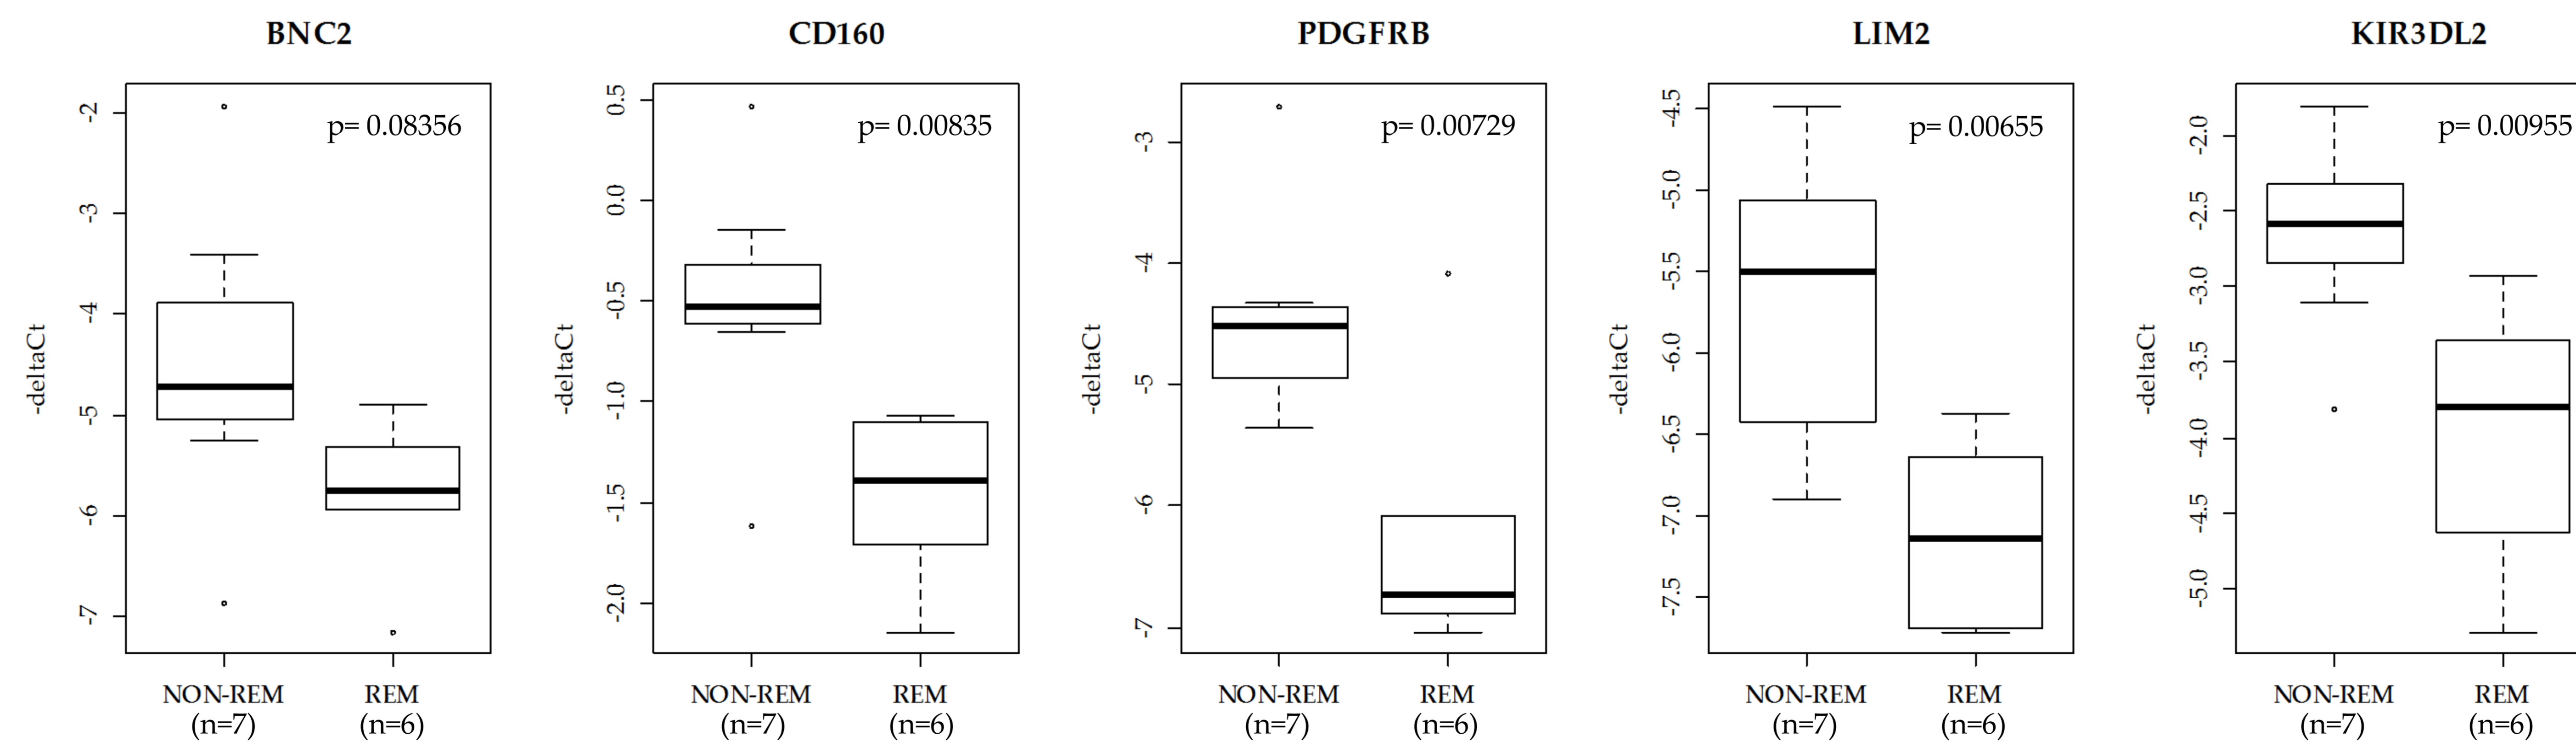

**Additional file 9** qRT-PCR results of 5 core genes of each signature identified from GSEA. GUSB was used as an internal control to normalize cDNA input. Distribution of  $-\Delta\text{Ct}$  values within REM and NON-REM were compared using boxplots. p-Values were determined using Student's t-test.

REM, patients with CDAI remission\* at 6 months of biologic therapy; NON-REM, patients without CDAI remission\* at 6 months of biologic therapy.

\* CDAI remission is defined as CDAI  $\leq$  2.8.
