# Supplementary material for: Identification of baseline gene expression signatures predicting therapeutic responses to three biologic agents in rheumatoid arthritis: a retrospective observational study
Source: Springer Nature journal article supplement (doi:10.1186/s13075-016-1052-8), 2016-07-08
Supplement: MOESM10 [file 10538874]

(A)

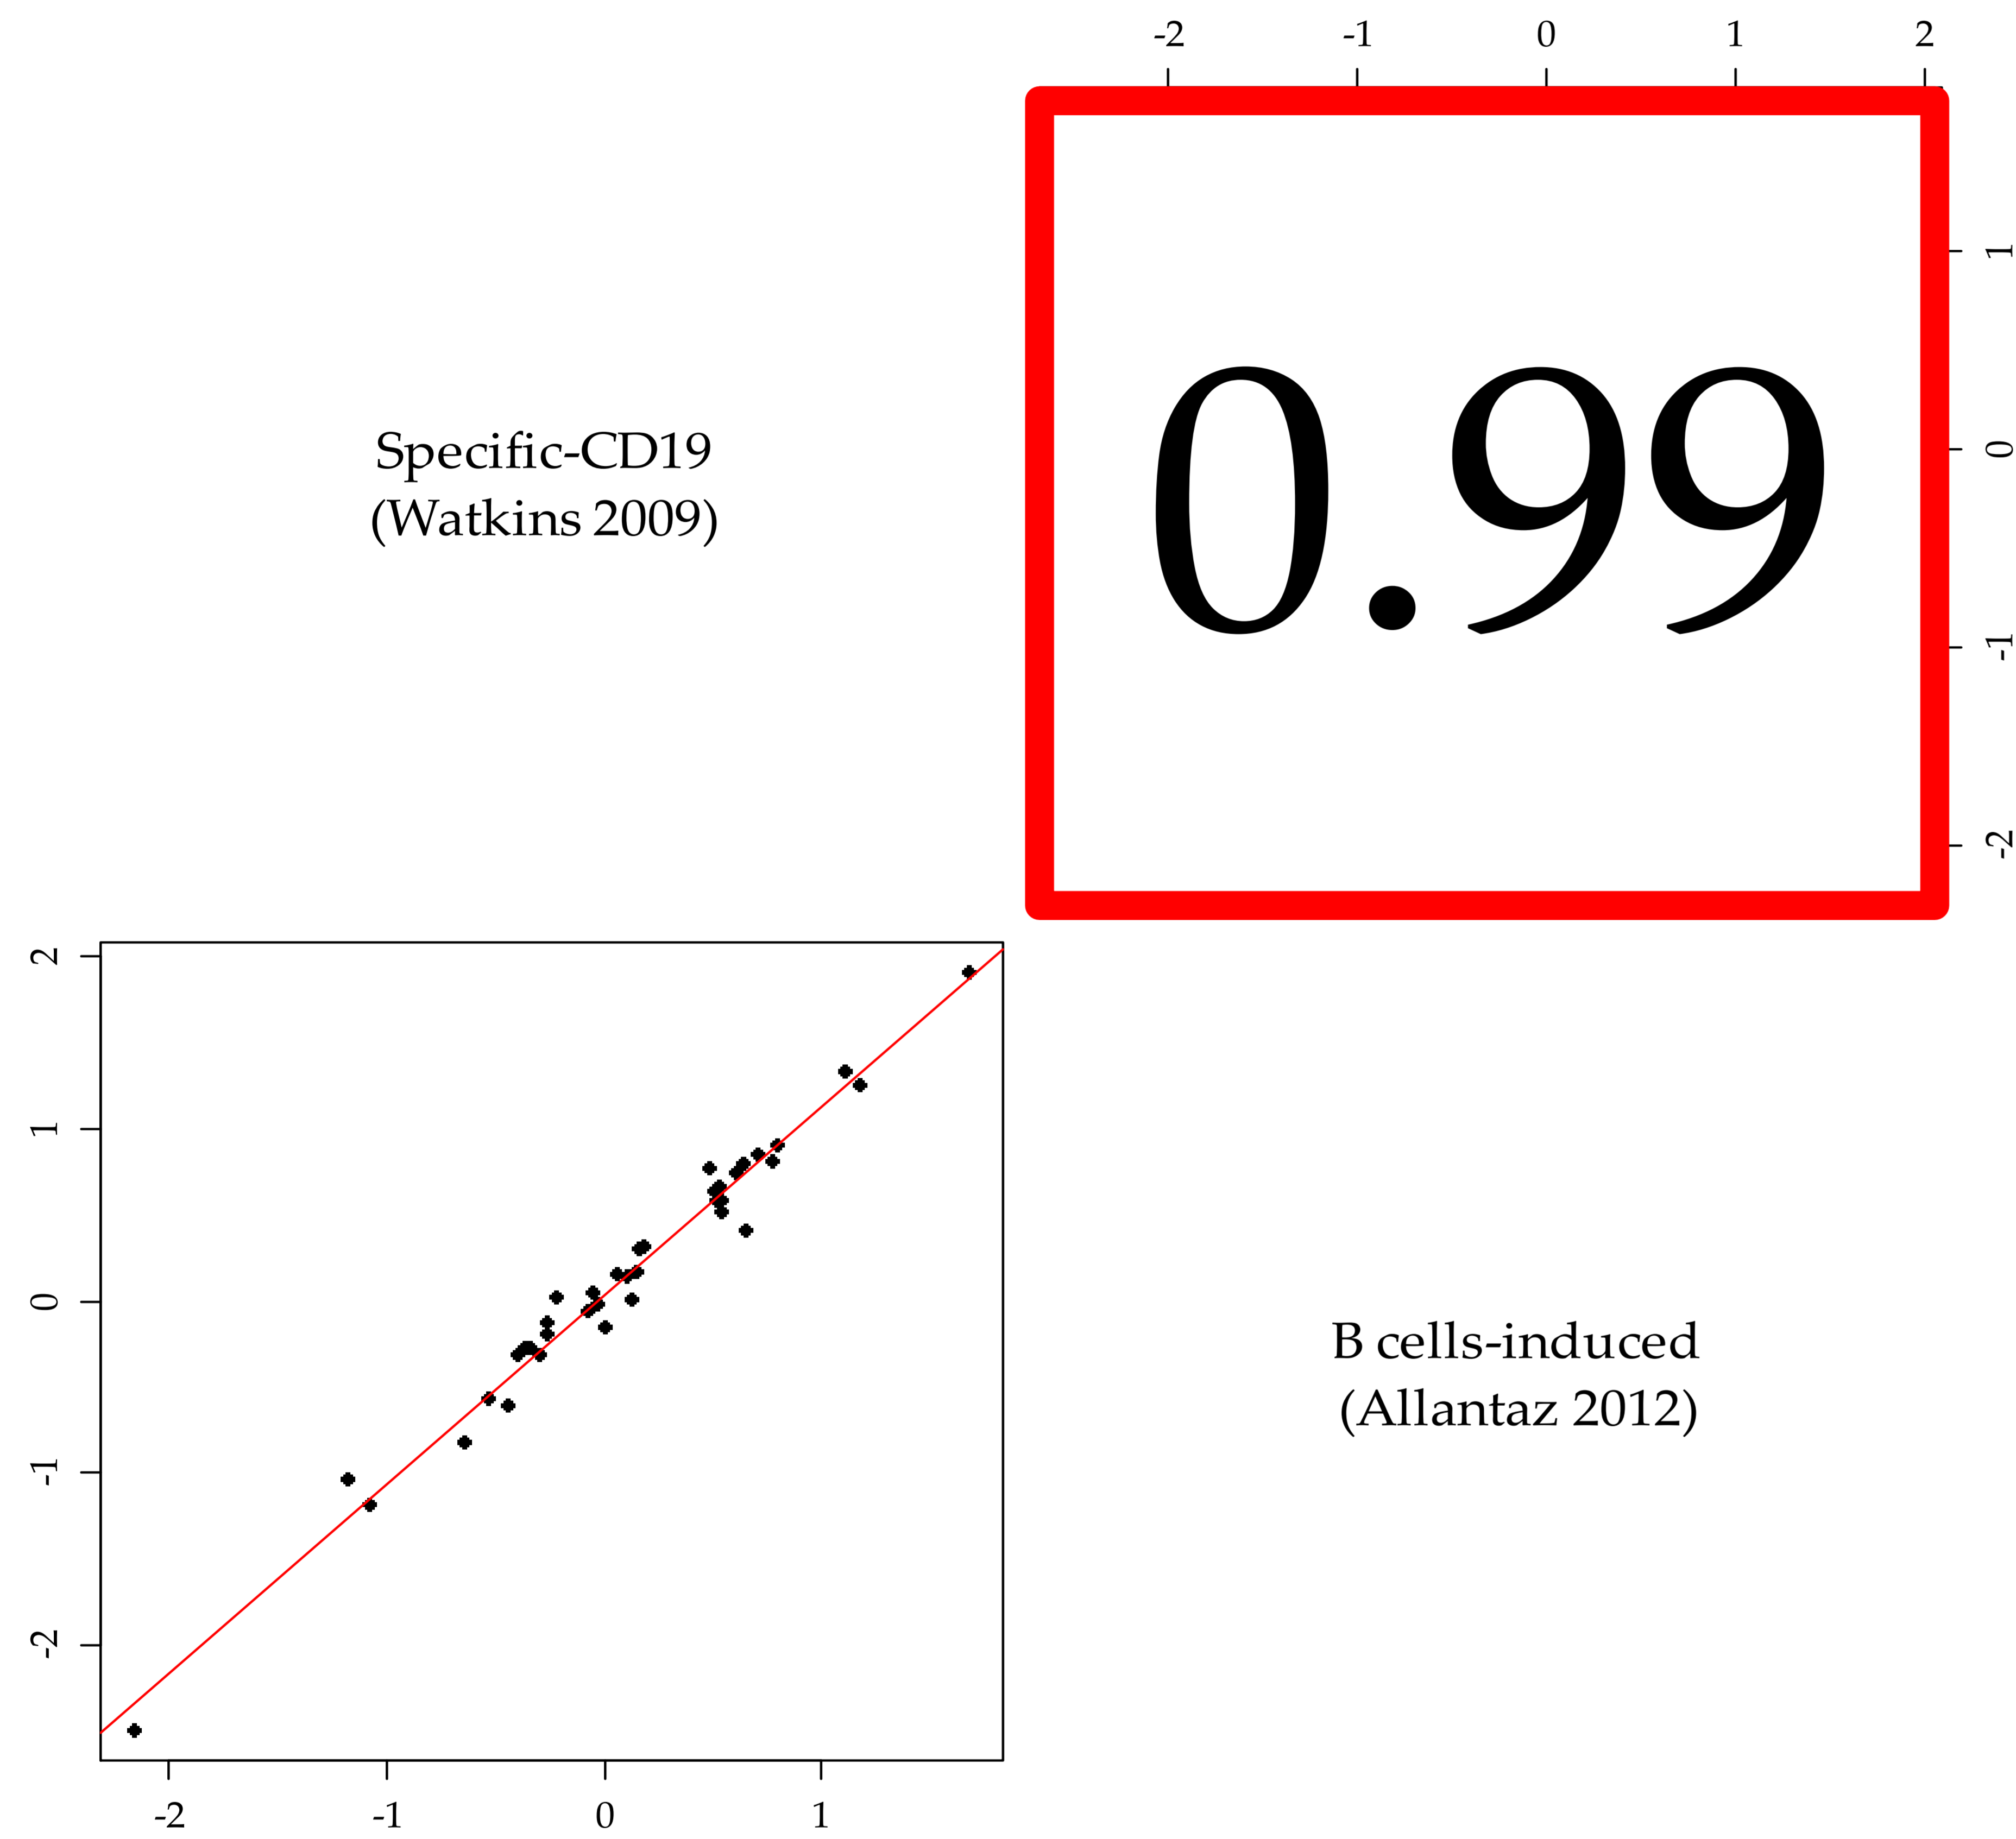

(B)

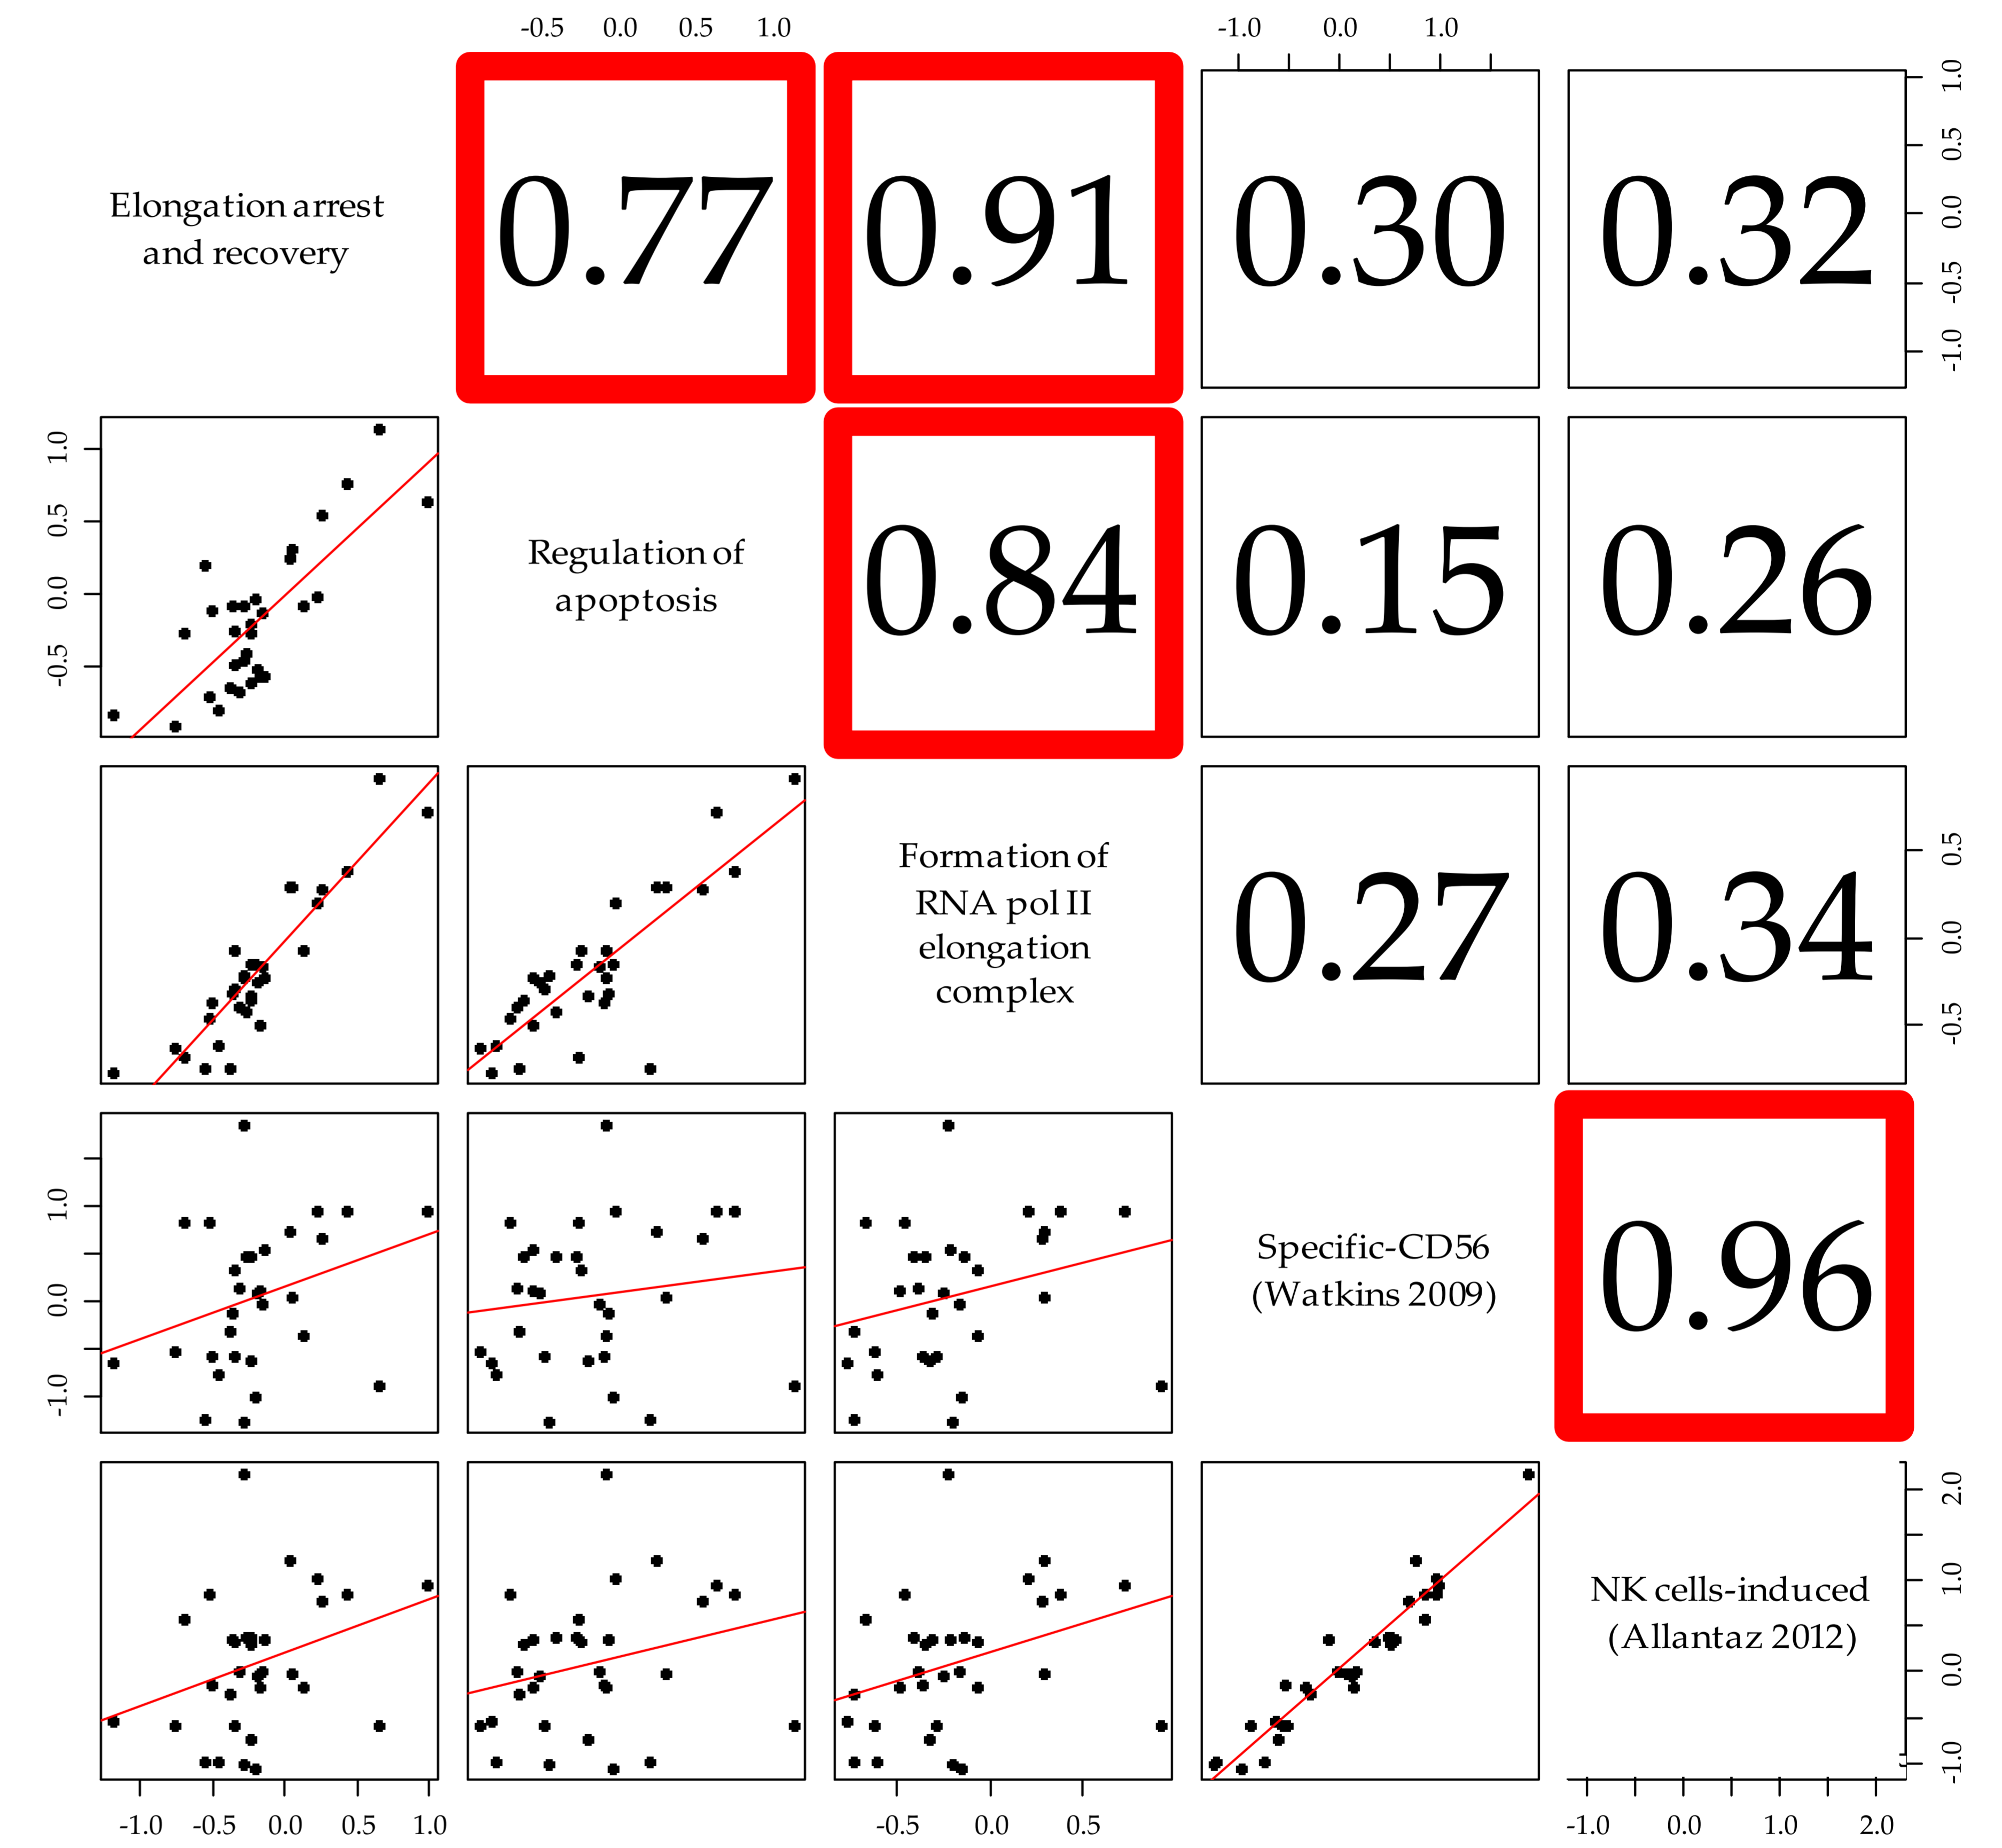

**Additional file 10** Correlation matrixes of signature scores of core genes for TCZ (A) and ABT (B). Pearson's correlation coefficient is shown diagonal to each of the scatter plot and indicated in red frame when the correlation is high.
